# Supplementary material for: 17β-estradiol and estrogen receptor α protect right ventricular function in pulmonary hypertension via BMPR2 and apelin
Source: JCI journal article supplement (doi:10.1172/jci129433), 2021-01-26
Supplement: sd1 [file 1]

1 Online Data Supplement

2 **17 $\beta$ -estradiol and estrogen receptor- $\alpha$  protect right ventricular function in pulmonary**  
3 **hypertension via BMPR2 and apelin**

4 A. L. Frump, M. Albrecht, B. Yakubov, S. Breuils-Bonnet, V. Nadeau, E. Tremblay, F. Potus, J.  
5 Omura, T. Cook, A. Fisher, B. Rodriguez, R.D. Brown, K. R. Stenmark, C. D. Rubinstein, K.  
6 Krentz, D. M. Tabima, R. Li, X. Sun, N. C. Chesler, S. Provencher, S. Bonnet, T. Lahm

7

8

9

10

11

12

13

14

15

16

17

18

19

20

21  
22  
23  
24  
25  
26  
27  
28  
29  
30  
31  
32  
33  
34  
35  
36  
37  
38  
39  
40  
41  
42  
43

## Supplemental Materials and Methods

All experiments were performed in accordance with recent recommendations (1-3), including randomization and blinding at the time of measurement and analysis.

### *Animal care*

All rodents used in studies were approved by the Indiana University School of Medicine Institutional Animal Care and Use Committee (Protocol #11220) and were adherent with the National Institutes of Health guidelines for care and use of laboratory animals under the animal welfare assurance act. Rats and mice were allowed *ad libitum* access to food and water and were housed in a facility with a 12-hour light/dark cycle.

### *CRISPR/Cas9-mediated generation of ER $\alpha$ (*Esr1*) loss-of-function mutant rats*

Two target sequences (GCCGTGTTCAACTACCCCGAGGG and GCTGCGCAAGTGTTACGAAGTGG) within the second and third exon, respectively, of the coding sequence of *Esr1* (the rat gene encoding ER $\alpha$ ) were selected. gRNAs targeting these sequences were synthesized *via in vitro* transcription. gRNAs (25 ng/ $\mu$ l each) were co-microinjected with Cas9 protein (40 ng/ $\mu$ l) into Sprague-Dawley rat embryos, and embryos were transferred into pseudo-pregnant recipients. Weanlings from this process were sampled and *Esr1* mutations were molecularly characterized. We validated these 6 animals with loss-of-function for *Esr1* due to the introduction of non-sense mutations or chromosomal rearrangements at this locus at the transcript level in RV tissue (Suppl. Table 1; presumably due to disruption of the transcriptional unit and nonsense mediated decay), and characterized these animals in the HPH studies. Animals heterozygous for a 25 base pair deletion in *Esr1* exon 3 were used to establish

44 an ER $\alpha$  mutant colony, and subsequent homozygous mutant offspring were used in SuHx-PH  
45 studies.

46

#### 47 *BMPR2 $\Delta$ 71 mutant rats*

48 Rats were generated as described previously using the zinc finger nuclease method (4).  
49 WT littermates served as controls. Age-matched 6-week old male or ovariectomized female rats  
50 underwent PAB or sham surgery. A subgroup PAB rats were given E2 (75  $\mu$ g/kg/day *via*  
51 subcutaneous pellets) at the time of surgery. Rats underwent closed-chest right heart  
52 catheterization with a Transonic pressure volume 1.6F catheter (Transonic, Ithaca, NY) to assess  
53 right ventricular end diastolic pressure (RVDEP), right ventricular cardiac output (CO), and  
54 echocardiography to assess pulmonary artery acceleration time (PAAT).

55

#### 56 *In vivo treatment with ML221*

57 Male Sprague-Dawley rats (150-180g; Charles River) underwent PAB or sham surgery. A  
58 subgroup of PAB rats were given E2 (75  $\mu$ g/kg/day *via* subcutaneous pellets) +/- ML221 (10  
59 mg/kg/day *via* subcutaneous pellets; Cayman Chemical, Ann Arbor, MI; Innovative Research of  
60 America, Sarasota, FL) at the time of surgery. RV function was monitored by echocardiography.

61

#### 62 *Hemodynamic assessment and echocardiography*

63 Hemodynamic and echocardiographic assessments were performed under isoflurane  
64 anesthesia (1-2%) as described previously (14, 68). RVSP was measured with a 2-Fr Millar  
65 catheter (Houston, TX) using LabVIEW software (National Instruments, Houston, TX). Cardiac  
66 output was derived from velocity time integral in the RV outflow tract and expressed relative to

67 body mass as cardiac index (CI) (15). Total pulmonary vascular resistance index (TPRI) was  
68 calculated as RVSP/CI.

69

#### 70 *RV Tissue collection*

71 The RV free wall was cleaned in saline and weighed. The apex was fixed in 16% neutral  
72 buffered formalin for 48 hours for immunohistochemical analysis; the remainder was snap-frozen  
73 in liquid nitrogen for biochemical analysis.

74

#### 75 *Yearling steer studies*

76 We performed studies in yearling steers since these animals provide a model of PH and  
77 RV hypertrophy that allowed us to corroborate our data obtained in rodents. Angus beef calves  
78 were born and raised at Rouse Ranch, Saratoga, WY (elevation 7120 ft/2170 m). Pulmonary  
79 artery pressures (PAP) were measured by right heart catheterization *via* the jugular vein in  
80 restrained, unsedated animals as previously described (5). At this time, two groups (n=10 each)  
81 of calves with the highest mean PAP (HPAP;  $52.9 \pm 5.8$  mmHg, range 47-64 mmHg) and lowest  
82 mean PAP (LPAP;  $35.3 \pm 1.7$  mmHg, range 33-38 mmHg) were selected for follow-up. Animals  
83 were maintained at the ranch under standard feed and housing conditions. PAP measurements  
84 were repeated on the study groups at twelve and thirteen months with accompanying blood  
85 collection at thirteen months. HPAP animals tended to show continuously increasing mean PAP  
86 (or progressive PH) and clinical signs of RVF; whereas LPAP animals showed constant or  
87 decreasing mean PAP (6). Five LPAP animals (physiologically adapted to altitude) and five HPAP  
88 animals (PH, maladapted to high altitude) were selected for RNA-Sequencing analysis. All  
89 experimental field procedures were performed with approval of the Colorado State University  
90 IACUC (protocol no. 09-1524A).

91 *RNA-Seq of bovine RV*

92           Animals were humanely euthanized at University of Wyoming Meat Science Laboratory,  
93 Laramie, WY (elevation 7165 ft/2184 m), at age 15 months in May 2013. RV tissues were  
94 collected, RNA was isolated using Trizol (Thermo Fisher) and validated for quality (RIN  $\geq$  7.0)  
95 using an Agilent BioAnalyzer (Santa Clara, CA). RNA libraries were constructed from total RNA  
96 using the Illumina TrueSeq (San Diego, CA), and RNA Sequencing at 100 bp single reads was  
97 performed using the Illumina HiSeq 2000. Sequencing reads, quality control, and RNASeq  
98 analysis was performed using the CLC Genomics Workbench (Qiagen Bioinformatics, Redwood  
99 City, CA) using the ENSEMBL bovine reference genome for assembly and annotation (UMD 3.1.  
100 release 77, [ftp://ftp.ensembl.org/pub/release-77/genbank/bos\\_taurus/](ftp://ftp.ensembl.org/pub/release-77/genbank/bos_taurus/)). Gene expression  
101 abundance, normalization, and threshold were set as Reads Per Kilobase per Million Mapped  
102 Reads (RPKM)  $>$  0.2. Data have been deposited in the NIH GEO repository, Ascension number  
103 GSE164320.

104

105 *RV endothelial cell (RVEC) isolation*

106           RVs were dissected from male Sprague-Dawley rats, minced and digested with  
107 Collagenase II (Gibco, ThermoFisher) at 37°C for 6 hrs. Cells were then positively selected using  
108 Pan-mouse IgG Dynabeads (ThermoFisher) coated with mouse monoclonal anti-rat CD31  
109 antibody (BD Biosciences) and then seeded on a gelatin-coated 6-well plate in EGM-2MV (Lonza)  
110 media supplemented with Normocin (Invivogen, San Diego, CA). Endothelial lineage was  
111 validated based on morphonology, von Willebrand factor stain, Matrigel tube formation, and Dio-  
112 AC-LDL uptake. Cells were utilized in experiments up to passage 7.

113

114

115 *Transwell migration and tube formation assays*

116 RVECs at 70-80% confluency were serum starved in 0.1% BSA and EBM-2 (Lonza)  
117 overnight. For ML221 pretreatment, 100 nM ML221 (Cayman Chemical, Ann Arbor, Michigan) or  
118 vehicle control (DMSO) was added to RVECs after serum starvation, 24 hours prior to transwell  
119 migration or tube formation assay.

120 *Transwell migration assay:*  $5 \times 10^4$  RVECs were seeded onto a 24-well transwell insert  
121 (Celltreat, Pepperell, MA; 8  $\mu$ m pore size) containing EBM2 in the upper chamber. RVCM  
122 conditioned media or EGM-2MV (as a positive control) were added to the bottom chamber of the  
123 24 well plate. Each condition was performed in technical triplicate and biological quadruplicate.  
124 Cells were allowed to migrate for 16 hrs, fixed with 70% EtOH and stained with Crystal violet. 15  
125 fields per condition were imaged at 10x magnification using a Nikon Eclipse 80i inverted  
126 microscope with camera and NIS-Elements 4.0 software (Nikon Instruments, Melville, NY) and  
127 quantified using ImageJ.

128 *Tube formation assay:*  $5 \times 10^4$  RVECs were plated onto Geltrex LDEV-free phenol red-free  
129 reduced growth factor basement membrane matrix (ThermoFisher) in EBM-2 basal media or  
130 RVCM conditioned media for 16 hours and then 15 fields per condition were imaged at 10x  
131 magnification using a Nikon Eclipse 80i inverted microscope with camera and NIS-Elements 4.0  
132 software (Nikon Instruments, Melville, NY) and quantified using ImageJ. Performed in technical  
133 triplicate in RVECs isolated from 4 male rats.

134

135 *Preparation of RVCM conditioned media*

136 Six hours after isolation or 24 hours post siRNA knockdown, AS serum containing media  
137 (Cellutron) was replaced with AW serum-free media (Cellutron) was to RVCMs for 24 hrs. Cells  
138 and conditioned media were collected, and cells were separated by centrifugation (500 x g, 2

139 min). Conditioned media was then strained using a 0.22 µm filter and used for RVCM conditioned  
140 media studies.

141

#### 142 *RVCM immunofluorescence*

143 RVCMs ( $5 \times 10^3$  cells/well) were plated on BioCoat Poly-D-Lysine/Laminin coated culture  
144 slides (Corning, Bedford, MA). To verify viability, prior to plating, cells were stained with Trypan  
145 Blue solution (Corning). Cells were fixed with 4% paraformaldehyde and blocked with 3% goat  
146 serum. Primary antibodies used were rabbit polyclonal anti-ER $\alpha$  (1:100; Santa Cruz HC-20;  
147 Dallas, TX) and mouse monoclonal anti- $\alpha$ -actinin (1:800; Sigma). Secondary fluorochrome-  
148 conjugated anti-rabbit antibody (1:200; Alexa Fluor 488; Thermo Fisher), fluorochrome-  
149 conjugated anti-mouse antibody (1:200; Alexa Fluor 594; Thermo Fisher) and anti-fade DAPI  
150 (Thermo Fisher) mounting media were used. Images were taken using a Nikon Eclipse 80i  
151 microscope with camera and NIS-Elements 4.0 software (Nikon Instruments, Melville, NY) at 40x  
152 magnification.

153

#### 154 *In vitro treatment with fulvestrant (ICI 182,780)*

155 H9c2 cells were serum starved overnight and then pretreated with the non-selective ER  
156 antagonist fulvestrant (ICI 182,780; 100 nM; Tocris, Bristol, United Kingdom) or ICI + E2 (100 nM  
157 each) for 24 hours. Cells were then treated with staurosporine (50 nM; Sigma Aldrich) for 4 hours.

158

#### 159 *siRNA experiments*

160 RVCMs were transfected with lipofectamine RNAimax (Thermo Fisher) and Silencer  
161 Select siRNA oligos directed against apelin or scrambled control (Thermo Fisher) for 24 hours.

162 H9c2 were transfected at 50% confluency with lipofectamine 2000 (Thermo Fisher) and Silencer  
163 Select siRNA oligos (Thermo Fisher) directed against ER $\alpha$ , BMPR2, apelin or scrambled control  
164 for 24 hours as directed by the manufacturer. Knockdown of target protein was confirmed by  
165 Western blot.

166

#### 167 *In vitro E2 and ER $\alpha$ agonist treatment*

168 H9c2 cells or isolated RVCs were treated with E2 (1 nM-100 nM, Sigma), the ER $\alpha$ -  
169 selective agonist BTP $\alpha$  (7) (1-100 nM; obtained through academic collaboration with Eli Lilly;  
170 Indianapolis, IN) or ethanol vehicle control for times indicated.

171

#### 172 *Real-time RT-PCR*

173 Total RNA was isolated from rat RVs using RNeasy Plus Fibrous Mini Kit (Qiagen;  
174 Valencia, CA). 1  $\mu$ g total RNA was reverse transcribed using iScript cDNA synthesis kit (Bio-Rad,  
175 Hercules, CA). TaqMan gene expression assays for rat *Ap1n*, *Slc27a1*, *Acs11*, *Nppa*, *Nppb* or  
176 *Hprt1* (assay IDs: Rn00581093\_m1, Rn00585821\_m1, Rn00563137\_m1, Rn00664637\_g1,  
177 Rn00580641\_m1, and Rn01527840\_m1; ThermoFisher) were used. Changes in mRNA  
178 expression were determined by the comparative CT ( $2^{-\Delta\Delta C_T}$ ) method.

179

#### 180 *Tissue homogenization*

181 Rat and mouse RV or LV tissue was homogenized using an Omni international tissue  
182 grinder (ThermoFisher) in ice-cold RIPA lysis buffer (Thermo Fisher) containing proteinase  
183 inhibitor cocktail (EMD-Millipore-Sigma Aldrich, St. Louis, MO) and PhosStop inhibitor cocktail



184 (Roche, Pleasanton, CA). After homogenization, lysate was sonicated for ten one-second pulses  
185 at 100% power and then centrifuged. The supernatant was saved and used as RV or LV lysate.

186

### 187 *Cell lysis*

188 RVECs and RVCMs were lysed using 10x Cell lysis buffer diluted with molecular biology  
189 grade water (ThermoFisher) and supplemented with Cell Signaling Biotechnology (Danvers,  
190 Mass) proteinase inhibitor cocktail (EMD-Millipore-Sigma Aldrich, St. Louis, MO) and PhosStop  
191 inhibitor cocktail (Roche, Pleasanton, CA). Cells were lysed using the manufacturers protocol.

192

### 193 *Western blot analysis*

194 Protein concentration was measured using BCA Protein Assay (Pierce-Thermo Fisher).  
195 Human RV tissue was collected and homogenized as described previously(8). For detailed  
196 antibody information see Suppl. Table 3. Rabbit polyclonal anti-ER $\alpha$  (1:1000; Santa Cruz HC-20;  
197 Dallas, TX), anti-ER $\beta$  (1:1000; Santa Cruz HC-150), anti-apelin (1:1000; Santa Cruz), anti-  
198 ERK1/2 (1:1000; Cell Signaling; Danvers, MA) anti-phospho-ERK1/2 (1:1000; Cell Signaling),  
199 anti-PKC $\epsilon$  (1:1000, ThermoFisher), anti-P38 (1:1000; Cell Signaling), anti-phospho-P38 (1:1000;  
200 Cell Signaling), anti-APJ (1:1000; abcam; Cambridge, MA) and mouse monoclonal anti-BMP2  
201 (1:1000; BD Biosciences; Franklin Lakes, NJ), and anti-Vinculin loading control (1:5000;  
202 Calbiochem; Billerica, MA) primary antibodies were used on mouse and rat RV and LV tissue  
203 homogenates. Rabbit polyclonal anti-ER $\alpha$ , anti-ER $\beta$ , and anti-apelin (all 1:1000, abcam) and  
204 mouse monoclonal anti-BMP2 (1:500, BD Biosciences) were used on human RV tissue  
205 homogenates. All antibodies were diluted in Pierce Protein-Free T20 blocking buffer  
206 (ThermoFisher). Anti-Rabbit-HRP (Cell Signaling, Danvers, MA) and anti-mouse-HRP (KPL,  
207 Gaithersburg, MD) secondary antibodies were diluted 1:2000 in Pierce Protein-Free T20 Blocking

208 Buffer. Human RV Western blots were normalized to Amido Black stain (Sigma Aldrich).  
209 Densitometry was performed using Image J.

210

### 211 *Assessment of hypertrophy and fibrosis in human and rat RV*

212 Human RV sections (5  $\mu\text{m}$ ) were stained with hematoxylin-eosin (for RV hypertrophy) and  
213 Masson-trichrome (for fibrosis). Cardiomyocyte-cross sectional area was obtained by tracing the  
214 outlines of cardiomyocytes with a clear nucleus image in hematoxylin-eosin stained sections (5  
215 random images and a minimum of 50 cardiomyocytes per specimen).The fibrosis area was  
216 measured on Masson-trichrome stained sections and expressed as percent of analyzed tissue  
217 sections. Analyses were performed using a Zeiss digital imaging microscopy workstation  
218 (Intelligent Imaging Innovations (3i), Denver, CO) and Image J Software (NIH, Bethesda, MD,  
219 USA).

220

### 221 *Immunofluorescence, assessment of fluorescence intensity, and nuclear localization in human* 222 *RV*

223 Immunofluorescent labeling for ER $\alpha$ , apelin and apelin receptor (APLNR) was performed  
224 using formalin-fixed paraffin-embedded human RV sections 4 $\mu\text{m}$  thick. Antigen retrieval was  
225 performed by heating samples in 0.01 M citrate buffer (10 mM Sodium Citrate, 0.05% Tween-20,  
226 pH 6.0). ER $\alpha$  (1:200 dilution; rabbit polyclonal; Abcam #ab3575) or Apelin receptor (1:200 dilution;  
227 rabbit polyclonal; Lsbio LS-B14256) along with CD31 (1:50 dilution; mouse monoclonal; Dako  
228 #M0823) primary antibodies and Alexafluor 594nm (1:500 dilution; Goat anti-rabbit IgG,  
229 ThermoFisher #A11037) and Alexafluor 488 nm (1:500; Goat anti-mouse IgG, ThermoFisher  
230 #A11001) secondary antibodies were used. DAPI staining was used to visualize nuclei. Apelin  
231 primary antibody (1:1000 dilution; rabbit polyclonal; Biorbyt #orb247041), was amplified by

232 Tyramide signal amplification (Cy3; Perkin Elmer NEL744E001KT). Secondary biotinylated  
233 antibody was applied (1:500 dilution; Goat anti-rabbit IgG, Chemicon, #AP132B) and developed  
234 with Vectastain HRP ABC Reagent (Vector Laboratories; # PK6100). CD31 labeling was  
235 visualized in far red (CY5 (1:500 dilution; Goat anti-mouse IgG, Jackson immunoresearch #115  
236 175 166). Negative controls were performed during each experiment by incubating secondary  
237 antibodies alone or by using rabbit IgG isotype control (1:500; SantaCruz sc-2027) and following  
238 all protocol steps including incubation with the secondary antibody. Imaging for each antibody  
239 was taken at the identical exposure time for each experimental condition/magnification. Images  
240 were acquired using a Carl Zeiss MicroImaging microscopy workstation and were quantified using  
241 Zen software.

242 Total fluorescence intensity was determined by measuring intensity over 20 short axis  
243 cardiomyocytes dispersed over 8 pictures per sample at 40X and divided by the area of the  
244 cardiomyocyte. For total fluorescence intensity in endothelial cells, fluorochrome intensity was  
245 measured in 8 vessels dispersed over 8 pictures per sample at 40X and divided by the area of  
246 the vessel. To quantify nuclear co-localization of ER $\alpha$  in cardiomyocytes, 8 pictures of transversal  
247 sections at 40X were taken and an average of 70 short axis cardiomyocytes distributed throughout  
248 the tissue were analyzed per specimen. To quantify nuclear expression in endothelial cells, 8  
249 vessels dispersed over 8 pictures at 40X distributed throughout the tissue were analyzed by  
250 specimen by quantifying the total number of ER $\alpha$  positive cells and DAPI positive cells in CD31  
251 layer. The percentage of positive labeled nuclei ((ER $\alpha$  +ve nuclei/ Total nuclei) \* 100) was  
252 quantified. To quantify cytoplasmic-membrane expression ER $\alpha$  in cardiomyocytes, 20  
253 cardiomyocytes were analyzed per specimen and nuclear expression was excluded. Total  
254 intensity (cytoplasmic and membrane) of the ER $\alpha$  in the cardiomyocyte was calculated and this  
255 value was divided by the area of the cardiomyocyte. For cytoplasmic-membrane expression in  
256 endothelial cells 8 vessels per sample were analyzed by manually encircle the vessel avoiding

257 the nuclei to obtain the intensity of the fluorochrome related to the protein of interest and the area  
258 of the vessel.

259

#### 260 *Immunohistochemistry (IHC)*

261 Immunoperoxidase staining for apelin and apelin receptor (APLNR) in rat RV was  
262 performed using formalin-fixed, paraffin-embedded sections. Rat RV sections were heated in  
263 citrate antigen retrieval buffer (10 mM Sodium Citrate, 0.05% Tween-20, pH 6.0). Apelin or  
264 APLNR were stained (1:100, abcam; 1:500, abcam, respectively) and detected with ABC  
265 amplification using Universal Vectastain ABC kit (Vector Laboratories, Burlingame, CA).

266

#### 267 *Chromatin immunoprecipitation (ChIP) assay*

268 Materials and protocol were provided by EMD Millipore EZ ChIP (MilliporeSigma,  
269 Burlington, MA). Cells were treated with formalin to crosslink DNA/Protein complexes. Complexes  
270 were sonicated for ten five-second pulses at 75% power and then incubated overnight with  
271 rotation at 4°C with Dynabeads (Thermo Fisher) bound with ER $\alpha$  (5  $\mu$ g protein/ml buffer; Santa  
272 Cruz). Beads were washed four times and pulled down. Protein was digested and then DNA was  
273 PCR-amplified using primers for the estrogen response element in the *Bmpr2* promoter. RNA  
274 polymerase II binding to the *Gapdh* promoter was used as a positive control.

275

#### 276 *Immunoprecipitation (IP) assay*

277 Cells were serum starved overnight and then treated with E2. After treatment times  
278 indicated, cells were lysed and incubated overnight with rotation in a cold room with Dynabeads  
279 (Life Technologies) bound with peroxisome proliferator-activated receptor gamma (PPAR- $\gamma$ )

280 antibody (5  $\mu$ g/ml; Santa Cruz). Beads were then washed, followed by addition of sample loading  
281 buffer directly to the beads. Samples were then boiled and run on a western blot.  $\beta$ -catenin  
282 antibody (1:5000, R&D Systems) was used to detect complex formation. IPs with IgG controls  
283 were used to demonstrate absence of non-specific antibody binding.

284

#### 285 *Caspase-3/7 activity assay*

286 Caspase-3/7 activity was quantified using the CaspACE (rat tissue) or ApoTox-Glow  
287 Triplex Assay (cells; both from Promega; Madison, WI) and expressed as relative light units  
288 (RLU). Caspase-3/7 activity in RV homogenates was measured as described previously (9). H9c2  
289 cells were pre-treated for 24 hours with E2 (1 nM - 100 nM, Sigma), the selective ER $\alpha$  agonist  
290 BTP $\alpha$  (7) (1 nM - 100 nM; obtained through academic collaboration with Eli Lilly; Indianapolis, IN),  
291 the selective ER $\alpha$  agonist PPT (0.1 nM - 10 nM) or ethanol or DMSO vehicle. Pro-apoptotic  
292 signaling was induced by treating cells with staurosporine (50 nM; Sigma) added to culture media  
293 for an additional 24 hours.

294

#### 295 *Statistical analysis*

296 Results are expressed as means $\pm$ SEM. Biologically-independent experiments (run in  
297 technical duplicates) were performed for all *in vitro* studies and reported as N. Statistical analyses  
298 were performed with GraphPad Prism 6 (La Jolla, CA). Sample sizes were estimated by power  
299 calculation. Student's t-test or one-way ANOVA with Tukey's or Dunnett's *post-hoc* correction was  
300 used for comparison of experimental groups. Correlations were determined using Pearson's  
301 coefficient (R). Normality testing for all data sets used in correlation analyses was performed using  
302 D'Agostini and Pearson testing as well as Shapiro-Wilk testing. Statistically significant difference  
303 was accepted at  $p < 0.05$ .

304  
305  
306  
307  
308  
309  
310  
311  
312  
313  
314  
315  
316  
317  
318  
319  
320  
321  
322  
323  
324  
325

## Supplemental results

### *ER $\alpha$ activation attenuates pro-apoptotic signaling*

Given our prior findings demonstrating that E2 attenuates RV pro-apoptotic signaling, we wanted to determine if ER $\alpha$ , in addition to regulating apelin, is also involved in mediating anti-apoptotic effects of E2. In particular, in H9c2 cells, E2 attenuated staurosporine-induced increases in activation of the stress signaling mediator P38MAPK in an ER-dependent manner (Suppl. Fig. 9), and two ER $\alpha$  agonists (BTP $\alpha$  or PPT) recapitulated E2's attenuating effects on pro-apoptotic signaling (caspase-3/7 activity) after staurosporine exposure (Suppl. Fig. 10).

### *Treatment with E2 upregulates BMPR2 canonical downstream signaling in RVs from PAB rats*

Given our findings demonstrating that E2 increases canonical BMPR2 signaling in rat cardiomyoblasts (Suppl. Fig. 11), we set out to determine whether E2 also stimulates canonical BMPR2 signaling *in vivo*. Indeed, in male or ovariectomized (OVX) female rats undergoing PAB for 11 weeks, E2 treatment (starting at the time of PAB and continued for the entire experimental period) was associated with a significant increase in RV Id1 protein expression as well as a trend for increased Smad1/5/8 phosphorylation (Suppl. Fig. 12).

326 **Supplemental Table 1**

| <b>Animal number</b> | <b>Sex</b> | <b>Exon 2</b>   | <b>Exon 3</b>  | <b>Predicted phenotype</b> | <b>ER<math>\alpha</math> (<i>Esr1</i>) mutation type</b> |
|----------------------|------------|-----------------|----------------|----------------------------|----------------------------------------------------------|
| 1081                 | Female     | -18bp/-18bp     | -10bp, -10bp   | Sense, KO/ Sense, KO       | Hypomorph                                                |
| 1082                 | Female     | -363(TSS)/ -363 | -10bp, inv     | KO, KO/ KO, inv            | Homozygous Null                                          |
| 1086                 | Male       | -18bp/ -18bp    | -10bp, -4bp    | Sense, KO/ Sense, KO       | Hypomorph                                                |
| 1087                 | Male       | -58bp/ -58bp    | Inv, inv       | KO, inv/ KO, inv           | Homozygous Null                                          |
| 1088                 | Male       | Brkpnt/ brkpnt  | Brkpnt, brkpnt | Excision/excision          | Heterozygous Null                                        |
| 1090                 | Female     | Inv/ inv        | Inv, inv       | Dupl-inv/dupl-inv          | Heterozygous Null                                        |

327 **Supplemental Table 1: CRISPR/Cas9-mediated ER $\alpha$  (*Esr1*) mutations in Sprague-Dawley**  
328 **rats.** Molecular characterization results *via* PCR and sequencing, predicted allelic phenotype, and  
329 mutation type generated from targeting exon 2 and exon 3 of the *Esr1* gene (the gene encoding  
330 ER $\alpha$ ) in male and female Sprague-Dawley rats. DNA repair events captured in our  
331 characterization assays include the introduction of indels (for which the net loss of base pairs is  
332 given), excisions between both target sites (for which the chromosomal breakpoints are listed),  
333 inversions (primers annealing the same strand anomalously generated a PCR product), and  
334 compounded duplications and inversions (inversions that gave a larger fragment than expected).  
335 Bp = base pairs; TSS = transcription start site loss; brkpnt = breakpoint; inv = inversion; sense =  
336 sense mutation; KO =non-sense mutation; dupl-inv = duplication-inversion mutation.

337

338

339

340 Supplemental Table 2: Patient Characteristics

341

| Category | Diagnosis                                  | Cause of death                       | Origin of tissue | Patient sex | Patient age (years) | Tricuspid gradient (mmHg) | RV Fibrosis (%) | RV Hypertrophy (RV myocyte cross sectional area, $\mu\text{m}^2$ ) | mPAP (mmHg) | PAOP (mmHg) | RAP (mmHg) | PVR (WU) | CO* (L/min) | CI* (L/min/m <sup>2</sup> ) | LVEF (%) | TAPSE (mm) | NYHA class | 6MWD (m) | PAH medications                      |
|----------|--------------------------------------------|--------------------------------------|------------------|-------------|---------------------|---------------------------|-----------------|--------------------------------------------------------------------|-------------|-------------|------------|----------|-------------|-----------------------------|----------|------------|------------|----------|--------------------------------------|
| Control  | Coronary artery disease                    | Sudden cardiac death*                | Autopsy          | Female      | 43                  | N/A                       | 0.61            | 148.24                                                             | N/A         | N/A         | N/A        | N/A      | N/A         | N/A                         | N/A      | N/A        | N/A        | N/A      | N/A                                  |
| Control  | Coronary artery disease                    | Sudden cardiac death*                | Autopsy          | Male        | 29                  | N/A                       | 4.49            | 218.03                                                             | N/A         | N/A         | N/A        | N/A      | N/A         | N/A                         | N/A      | N/A        | N/A        | N/A      | N/A                                  |
| Control  | Coronary artery disease                    | Sudden cardiac death*                | Autopsy          | Male        | 65                  | N/A                       | 3.49            | 188.81                                                             | N/A         | N/A         | N/A        | N/A      | N/A         | N/A                         | N/A      | N/A        | N/A        | N/A      | N/A                                  |
| Control  | Coronary artery disease                    | Sudden cardiac death*                | Autopsy          | Female      | 49                  | N/A                       | 1.28            | 214.66                                                             | N/A         | N/A         | N/A        | N/A      | N/A         | N/A                         | N/A      | N/A        | N/A        | N/A      | N/A                                  |
| Control  | Coronary artery disease                    | Sudden cardiac death*                | Autopsy          | Male        | 52                  | N/A                       | 2.13            | 173.41                                                             | N/A         | N/A         | N/A        | N/A      | N/A         | N/A                         | N/A      | N/A        | N/A        | N/A      | N/A                                  |
| Control  | Ross Procedure (aortic stenosis)           | Not applicable (patient still alive) | Surgery          | Female      | 42                  | 24                        | N/A             | N/A                                                                | N/A         | N/A         | N/A        | N/A      | N/A         | N/A                         | 63       | N/A        | II         | N/A      | N/A                                  |
| Control  | Coronary artery disease                    | Sudden cardiac death*                | Autopsy          | Female      | 48                  | N/A                       | 3.01            | 145.61                                                             | N/A         | N/A         | N/A        | N/A      | N/A         | N/A                         | N/A      | N/A        | N/A        | N/A      | N/A                                  |
| Control  | Ross Procedure (aortic stenosis)           | Not applicable (patient still alive) | Surgery          | Female      | 50                  | 20                        | N/A             | N/A                                                                | N/A         | N/A         | N/A        | N/A      | N/A         | N/A                         | 50       | 21         | II-III     | N/A      | N/A                                  |
| Control  | Coronary artery disease                    | Sudden cardiac death*                | Autopsy          | Male        | 28                  | N/A                       | N/A             | N/A                                                                | N/A         | N/A         | N/A        | N/A      | N/A         | N/A                         | N/A      | N/A        | N/A        | N/A      | N/A                                  |
| RVF      | Pulmonary valve regurgitation <sup>†</sup> | Not applicable (patient still alive) | Surgery          | Female      | 46                  | 14                        | N/A             | N/A                                                                | N/A         | N/A         | 0-5        | N/A      | 3.29        | 1.73                        | 60       | 22         | II         | N/A      | N/A                                  |
| RVF      | Ventricular septal defect                  | Cerebrovascular accident             | Autopsy          | Female      | 57                  | 125                       | 18.68           | 390.40                                                             | N/A         | N/A         | 5-10       | N/A      | 2.79        | 1.74                        | 60       | 17         | N/A        | 419      | N/A                                  |
| RVF      | Ventricular septal defect                  | N/A                                  | Surgery          | Male        | 61                  | N/A                       | N/A             | N/A                                                                | N/A         | N/A         | 10-15      | N/A      | N/A         | N/A                         | 55       | N/A        | II         | N/A      | N/A                                  |
| RVF      | iPAH                                       | RVF**                                | Autopsy          | Female      | 40                  | N/A                       | N/A             | N/A                                                                | N/A         | N/A         | N/A        | N/A      | N/A         | N/A                         | N/A      | N/A        | N/A        | N/A      | N/A                                  |
| RVF      | iPAH                                       | RVF**                                | Autopsy          | Female      | 43                  | N/A                       | N/A             | N/A                                                                | N/A         | N/A         | N/A        | N/A      | N/A         | N/A                         | N/A      | N/A        | N/A        | N/A      | Sildenafil, epoprostenol             |
| RVF      | iPAH                                       | RVF**                                | Autopsy          | Male        | 45                  | N/A                       | N/A             | N/A                                                                | N/A         | N/A         | N/A        | N/A      | N/A         | N/A                         | N/A      | N/A        | N/A        | N/A      | Bosentan, sildenafil                 |
| RVF      | iPAH                                       | RVF**                                | Autopsy          | Female      | 74                  | 94                        | N/A             | N/A                                                                | 35          | 10          | 4          | 6.8      | 4.1         | 2.5                         | 55       | N/A        | IV         | 186      | Bosentan                             |
| RVF      | SSc-PAH                                    | RVF**                                | Autopsy          | Female      | 54                  | N/A                       | 34.63           | 728.84                                                             | 46          | 15          | 22         | 4.93     | 3.7         | 1.9                         | 60       | 17         | IV         | 190      | Bosentan, sildenafil                 |
| RVF      | SSc-PAH                                    | RVF**                                | Autopsy          | Male        | 77                  | N/A                       | 13.08           | 291.76                                                             | 47          | 9           | 7          | 7.86     | 5.4         | 3.2                         | 50       | 13         | III        | 230      | Bosentan, sildenafil                 |
| RVF      | SSc-PAH                                    | RVF**                                | Autopsy          | Female      | 47                  | N/A                       | 20.29           | 457.18                                                             | 46          | 7           | 10         | 6.93     | 3.9         | 2.1                         | 60       | 12         | III        | 276      | Ambrisentan, tadalafil, epoprostenol |

342

Abbreviations: CO = cardiac output; CI = cardiac index; iPAH = idiopathic pulmonary arterial hypertension; LVEF = left ventricular ejection fraction; mPAP = mean arterial pressure; N/A = not available; NYHA = New York Heart Association; PAOP = pulmonary artery occlusion pressure; RAP = right atrial pressure; PVR = pulmonary vascular resistance; RVF = RV failure; SSc-PAH = scleroderma-associated pulmonary arterial hypertension; TAPSE = tricuspid annular plane systolic excursion; WU = Wood units; 6MWD = six minute walk distance.

Echocardiography, NYHA and 6MWD data in control patients were determined at the time of surgery. For RVF patients, most recent echocardiography, right heart catheterization, NYHA and 6MWD data were used. RV fibrosis and RV myocyte cross sectional area were determined *post mortem*.

<sup>†</sup> Hemodynamic measures may have been obtained several months prior to the patient's death and thus may not demonstrate CO/CI consistent with RVF. RVF at the time of death was determined by decreased TAPSE and/or a clinical course consistent with development of RVF.

<sup>‡</sup> Pulmonary valve regurgitation following previous surgical correction of Fallot Tetralogy.

\* Early autopsies performed following sudden deaths. None of those subjects had any past medical history. Autopsy revealed severe left main coronary artery and/or left anterior descending artery atherosclerosis with no other cause of death. Moreover, there were no macroscopic signs of chronic right or left heart dysfunction. All subjects exhibited normal heart size, no heart hypertrophy (left and right ventricle wall diameter of 1.3-1.5 cm and 0.2-0.5 cm, respectively) and normal pulmonary arteries. In the absence of other causes, deaths were assumed related to the severe coronary artery disease observed in those patients.

\*\* Early autopsies performed following deaths. RVF at the time of death was confirmed by decreased TAPSE and/or a clinical course consistent with development of RVF. Presence of RV failure and RV hypertrophy confirmed during autopsy. Evidence of left heart pathology was excluded during autopsy.



343 **Supplemental Table 3. Detailed Antibody Information**

| Antibody                   | Vendor                     | Catalog              | Clone         | Source |
|----------------------------|----------------------------|----------------------|---------------|--------|
| ERalpha                    | Abcam                      | Ab3575               |               | Rabbit |
| Apelin                     | Abcam                      | Ab181786             |               | Rabbit |
| Apelin                     | Santa Cruz                 | sc33804              | FL-77         | Rabbit |
| Vinculin                   | Calbiochem/Millipore/Sigma | Cp74                 | V284 or VLN01 | Mouse  |
| Phospho-ERK1/2             | Cell Signaling             | 4376s                | 20g11         | Rabbit |
| ERK1/2                     | Cell Signaling             | 4695s                | 137f5         | Rabbit |
| PKC epsilon                | ThermoFisher               | Ma5-32715            | JA38-21       | Rabbit |
| ER alpha                   | Santa Cruz                 | Sc-543               | Hc-20         | Rabbit |
| Beta actin                 | Sigma                      | A5316                |               | Mouse  |
| BMPR2                      | BD Biosciences             | 612262               |               | Mouse  |
| Beta catenin               | Millipore/Sigma            | 06-734               |               | Rabbit |
| PPAR gamma                 | Santa Cruz                 | Sc7273x              | E-8           | Mouse  |
| ER beta                    | Abcam                      | Ab3576               |               | Rabbit |
| Apelin receptor            | Abcam                      | Ab84296              |               | Rabbit |
| Phospho-P38                | Cell Signaling             | 4511s                | D3f9          | Rabbit |
| P38                        | Cell Signaling             | 9212s                |               | Rabbit |
| Phospho-Smad 1/5/9         | Cell Signaling             | 13820s               | D5b10         | Rabbit |
| Smad1                      | Cell Signaling             | 9743S                |               | Rabbit |
| Id1                        | Santa Cruz                 | Sc-488               | c-20          | Rabbit |
| Apelin                     | Biorbyt                    | Orb247041            |               | Rabbit |
| Apelin receptor            | Ls-bio                     | Ls-b14256            |               | Rabbit |
| CD31                       | Dako                       | M0823                |               | Mouse  |
| Alexafluor 488             | ThermoFisher               | A11001               |               | Mouse  |
| Alexafluor 594             | ThermoFisher               | A11037               |               | Rabbit |
| Goat antimouse igg         | Chemicon                   | Ap132b               |               | Rabbit |
| Goat antimouse igg cy5     | Jackson immunoresearch     | 115 175 166          |               | Mouse  |
| Rabbit igg isotype control | Santa cruz                 | Sc-2027              |               | Rabbit |
| Anti-rabbit-hrp            | Cell signaling             | 7074                 |               | Goat   |
| Anti-mouse-hrp             | KPL                        | 5220-0288 (04-18-18) |               | Goat   |
| Alpha actinin              | Sigma                      | A7811                | EA-53         | Mouse  |

344

345

346

347  
348  
349  
350  
351  
352  
353  
354  
355  
356  
357  
358  
359  
360  
361  
362  
363  
364  
365  
366  
367  
368  
369  
370  
371

## References

1. Provencher S, Archer SL, Ramirez FD, Hibbert B, Paulin R, Boucherat O, et al. Standards and Methodological Rigor in Pulmonary Arterial Hypertension Preclinical and Translational Research. *Circ Res*. 2018;122(7):1021-32.
2. Lahm T, Douglas IS, Archer SL, Bogaard HJ, Chesler NC, Haddad F, et al. Assessment of Right Ventricular Function in the Research Setting: Knowledge Gaps and Pathways Forward. An Official American Thoracic Society Research Statement. *Am J Respir Crit Care Med*. 2018;198(4):e15-e43.
3. Bonnet S, Provencher S, Guignabert C, Perros F, Boucherat O, Schermuly RT, et al. Translating Research into Improved Patient Care in Pulmonary Arterial Hypertension. *Am J Respir Crit Care Med*. 2017;195(5):583-95.
4. Hautefort A, Mendes-Ferreira P, Sabourin J, Manaud G, Bertero T, Rucker-Martin C, et al. Bmpr2 Mutant Rats Develop Pulmonary and Cardiac Characteristics of Pulmonary Arterial Hypertension. *Circulation*. 2019;139(7):932-48.
5. Holt TN, and Callan RJ. Pulmonary arterial pressure testing for high mountain disease in cattle. *Vet Clin North Am Food Anim Pract*. 2007;23(3):575-96, vii.
6. Neary JM, Garry FB, Holt TN, Brown RD, Stenmark KR, Enns RM, et al. The altitude at which a calf is born and raised influences the rate at which mean pulmonary arterial pressure increases with age. *J Anim Sci*. 2015;93(10):4714-20.
7. Chalmers MJ, Wang Y, Novick S, Sato M, Bryant HU, Montrose-Rafizdeh C, et al. Hydrophobic Interactions Improve Selectivity to ERalpha for Ben-zothiophene SERMs. *ACS Med Chem Lett*. 2012;3(3):207-10.
8. Potus F, Ruffenach G, Dahou A, Thebault C, Breuils-Bonnet S, Tremblay E, et al. Downregulation of MicroRNA-126 Contributes to the Failing Right Ventricle in Pulmonary Arterial Hypertension. *Circulation*. 2015;132(10):932-43.

372 9. Petrache I, Fijalkowska I, Medler TR, Skirball J, Cruz P, Zhen L, et al. alpha-1 antitrypsin  
373 inhibits caspase-3 activity, preventing lung endothelial cell apoptosis. *Am J Pathol.*  
374 2006;169(4):1155-66.

375

376

377

378

379

380

381

382

383

384

385

386

387

388

389

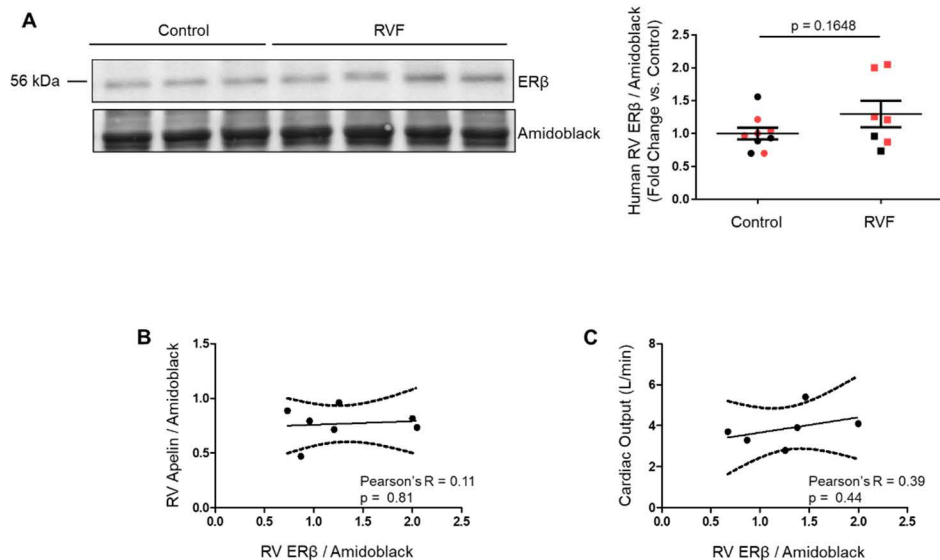

390

391 **Supplemental Figure 1: ERβ expression is not altered in RVs from patients with RV failure**

392 **(RVF) and does not correlate with apelin or RV function. (A)** Western blot analysis of ERβ

393 expression in human control and failing RVs. A representative Western blot is shown.

394 Densitometry includes data from all subjects. Red and black symbols in graphs represent samples

395 from female and male patients, respectively. Error bars represent means ± SEM. Blot is from the

396 same gel as Fig. 2A of the main manuscript. (B) ERβ does not correlate with apelin expression

397 or (C) cardiac output in RVF patients. Correlation analyses were performed by determining

398 Pearson's correlation coefficient (R) and two-tailed p-value. Dashed lines represent 95%

399 confidence intervals.

400

401

402

403

404

**A**

| PH model           | CO (ml/min)                 | Percent change from control | RV/(LV+S)                 | Percent change from control | RVSP (mmHg)                 | Percent change from control | RV end-diastolic diameter (mm) | Percent change from control |
|--------------------|-----------------------------|-----------------------------|---------------------------|-----------------------------|-----------------------------|-----------------------------|--------------------------------|-----------------------------|
| Normoxia (control) | 222.2 ± 46.41               | -                           | 0.26 ± 0.01               | -                           | 25 ± 2                      | -                           | n/a                            | n/a                         |
| SuHx (adaptive)    | 186.3 ± 7.387               | -16.1%                      | 0.40 ± 0.07*              | +36.5%                      | 46.67 ± 10.26               | +46.4%                      | n/a                            | n/a                         |
| SuHx (maladaptive) | 87.45 ± 8.327* <sup>^</sup> | -60.6%                      | 0.66 ± 0.08* <sup>^</sup> | +61.4%                      | 64.33 ± 13.58*              | +61.1%                      | n/a                            | n/a                         |
| Control            | 217.9 ± 26.93               | -                           | 0.23 ± 0.02               | -                           | 20.25 ± 2.63                | -                           | n/a                            | n/a                         |
| MCT (adaptive)     | 143.3 ± 7.86                | -34.2%                      | 0.31 ± 0.12               | +27.7%                      | 36.5 ± 15.89                | +44.5%                      | n/a                            | n/a                         |
| MCT (maladaptive)  | 90.06 ± 12.17*              | -58.7%                      | 0.65 ± 0.10* <sup>^</sup> | +65.2%                      | 63.25 ± 14.57*              | 68%                         | n/a                            | n/a                         |
| Sham (control)     | 308.5 ± 58.95               | -                           | 0.23 ± 0.02               | -                           | 22 ± 1.414                  | -                           | 2.715 ± 0.3416                 | -                           |
| PAB (adaptive)     | 138.1 ± 54.85*              | -55.2%                      | 0.32 ± 0.16               | +29%                        | 23 ± 4.163                  | +4.3%                       | 3.179 ± 0.111                  | +14.6%                      |
| PAB (maladaptive)  | 99.67 ± 23.13*              | -67.7%                      | 0.59 ± 0.10* <sup>^</sup> | +61.3%                      | 47.25 ± 9.069* <sup>^</sup> | +53.4%                      | 4.673 ± 0.741* <sup>^</sup>    | +41.9%                      |

**B**

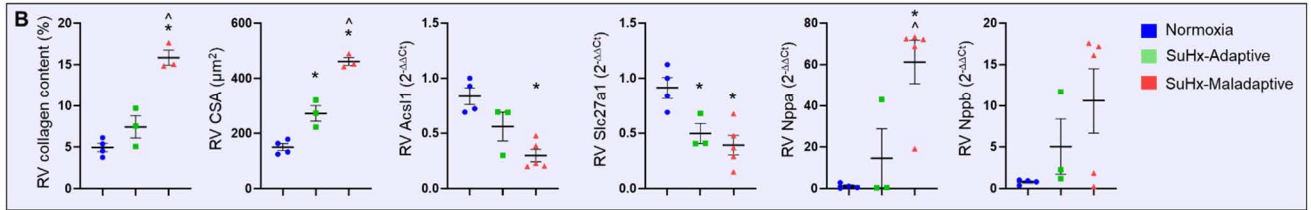

**C**

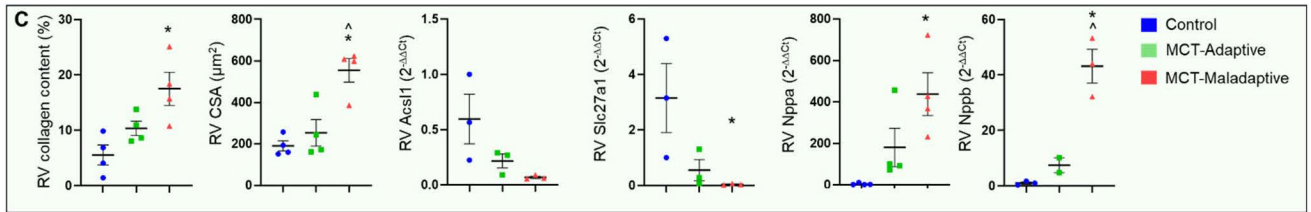

**D**

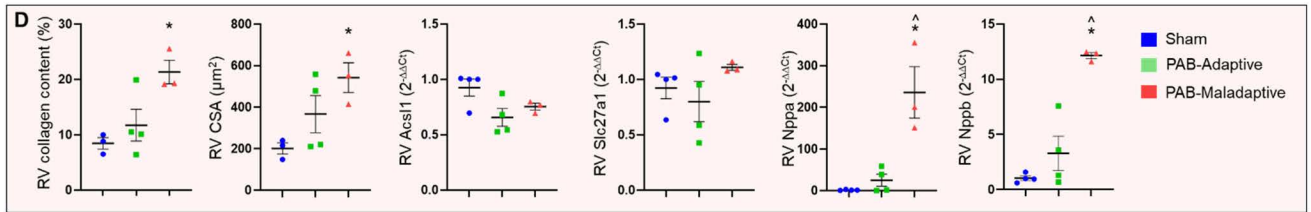

405

406

407

408

409

410

411

412

413 **Supplemental Figure 2: Hemodynamic, structural and molecular characterization of**  
414 **adaptive and maladaptive RV remodeling in various models of RV pressure overload. (A)**  
415 Identification of changes in cardiac output (CO), RV hypertrophy (RV/LV+S; right ventricle weight  
416 / left ventricle weight + septum weight), RV systolic pressure (RVSP) and RV dilation (RV end-  
417 diastolic diameter) in male rats with SuHx-PH, MCT-PH or PAB (N=3 per group). **(B-D)**  
418 Quantification of RV collagen content (via Trichrome stain), RV cardiomyocyte hypertrophy (via  
419 assessment of cell surface area [CSA]) and mRNA expression of genes involved in fatty acid  
420 synthesis (*Acs11*, *Slc27a1*) or neurohormonal activation (*Nppa*, *Nppb*; all via real-time RT-PCR)  
421 in **(B)** SuHx-PH, **(C)** MCT-PH and **(D)** PAB rats with adaptive or maladaptive RV remodeling as  
422 well as control rats. \*p<0.05 vs control, ^p<0.05 vs adaptive by one-way ANOVA with Tukey post-  
423 hoc correction. Each data point represents one animal. Error bars represent means ± SEM. n/a =  
424 not available, *Acs11* = Acyl-CoA synthetase long chain family member 1), *Slc27A1* = Solute carrier  
425 family 27 member 1/ Long-chain fatty acid transport protein 1), *Nppa* = atrial natriuretic peptide,  
426 *Nppb* = B-type natriuretic peptide.

427

428

429

430

431

432

433

434

435

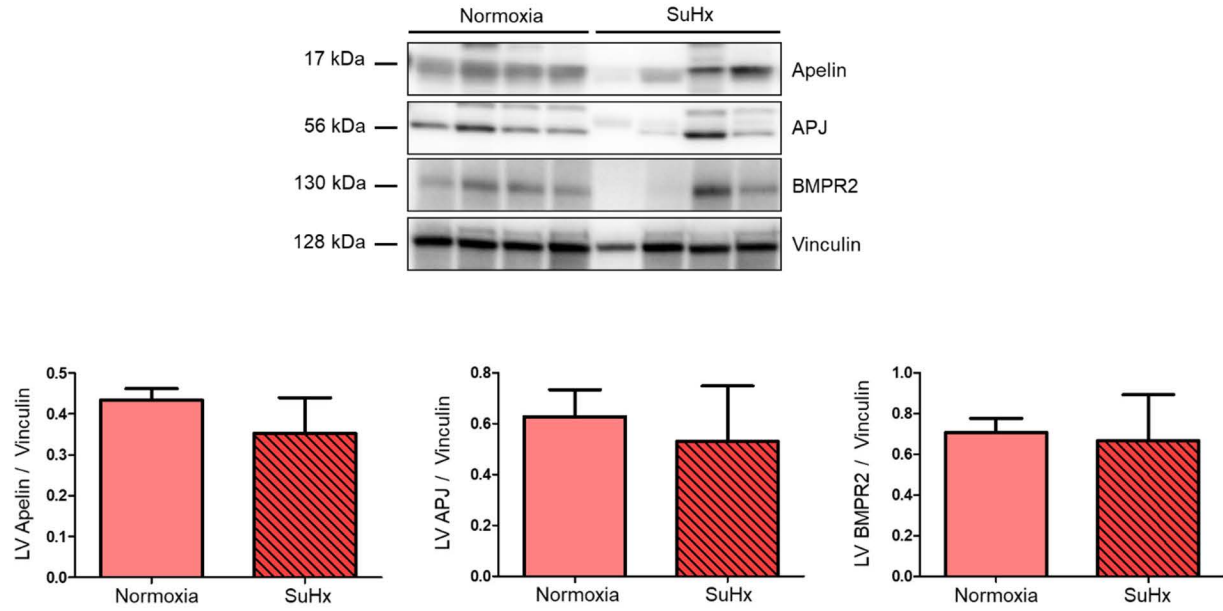

436

437

438

439 **Supplemental Figure 3: Lack of PH-induced changes in apelin and BMPR2 in the left**  
 440 **ventricle (LV).** Western blot analyses of apelin, apelin receptor APJ and BMPR2 in LV  
 441 homogenates from normoxia control or SuHx-PH female rats. N= 4 per group. Values expressed  
 442 as means  $\pm$  SEM.

443

444

445

446

447

448

449

450

451

452

453

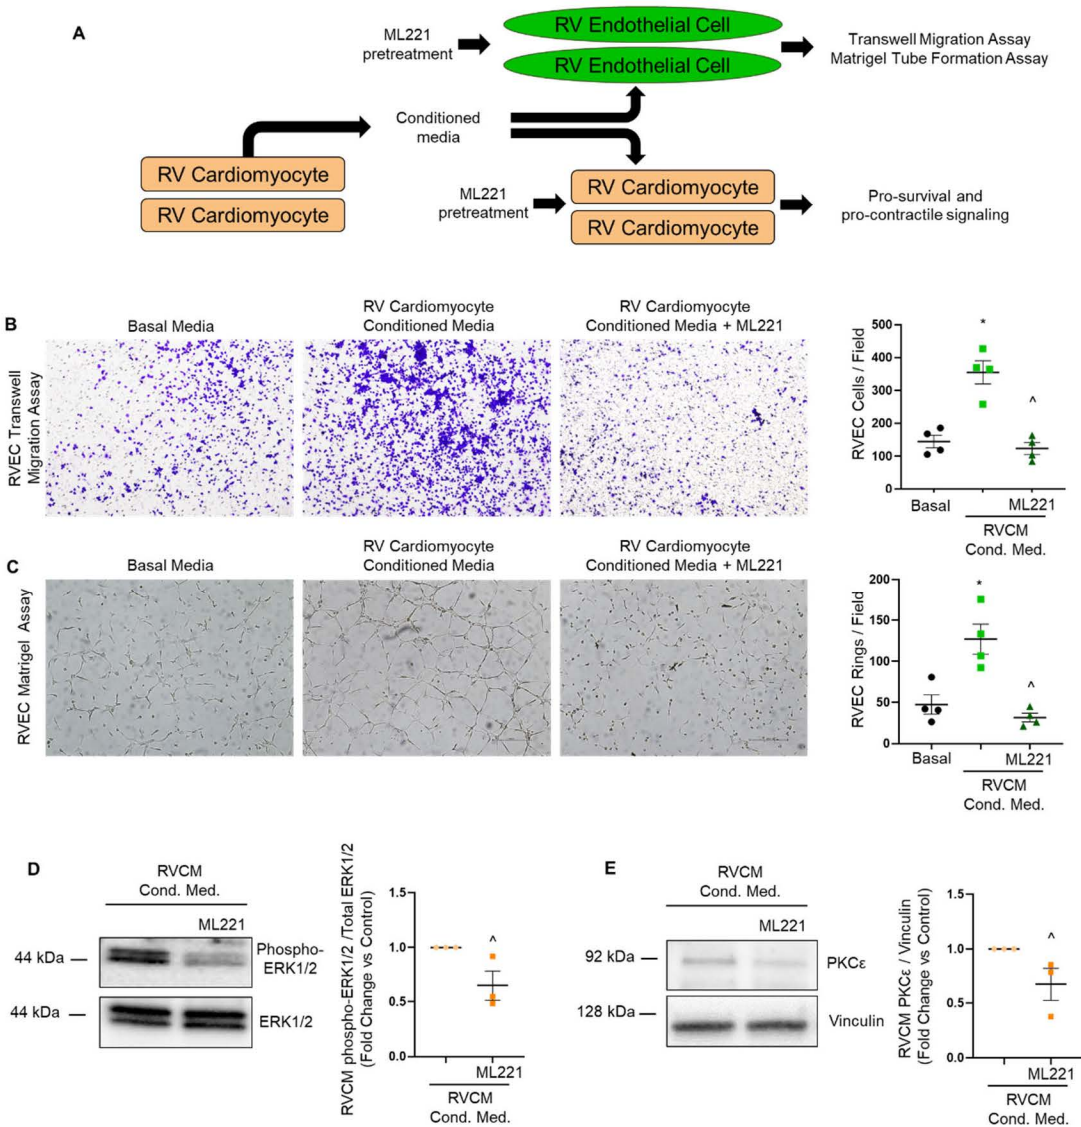

454

455

456 **Supplemental Figure 4: Inhibition of apelin receptor (APLNR) signaling abrogates RV**

457 **cardiomyocyte (RVCM) paracrine effects on RV endothelial cell (RVEC) and RVCM**

458 **function. (A) RVCM conditioned media experimental design. Conditioned media was collected**

459 **from RVCMs 24 hours after isolation and added to RVECs or RVCMs in absence or presence of**

460 **pretreatment with APLNR antagonist ML221 (100 nM, 4hrs). (B, C) Effects of intact apelin**

461 **signaling on RVEC function were evaluated by transwell migration assay and matrigel ring**

462 **formation assay. (B) demonstrates representative transwell migration assay images of RVECs**

463 **treated with basal media or RVCM conditioned media in absence or presence of ML221.**



464 Quantification of transwell migration is shown on the right. EBM2 media served as baseline  
465 control. Images are at 4x magnification. 15 fields per condition were quantified. N = RVECs from  
466 4 male rats, performed in technical triplicate. (C) depicts representative images of matrigel ring  
467 formation assay in RVECs treated with basal media or RVCM conditioned media in absence or  
468 presence of ML221. Quantification of ring formation is shown on the right. Cells were plated at a  
469 density of  $5 \times 10^4$  in technical triplicate. 16 hours later, representative images were taken at 4x  
470 magnification and rings were quantified in 15 fields per condition. N = RVECs from 4 male rats,  
471 performed in technical triplicate. (D-E) Effects of APLNR blockade on RVCM pro-survival and pro-  
472 contractile signaling were evaluated using conditioned media on RVCM in absence or presence  
473 of ML221 pretreatment. Apelin downstream targets ERK1/2 (D) and PKC $\epsilon$  (E) were evaluated by  
474 Western blot and densitometric quantification. N = RVCMs from 3 male rats, performed in  
475 technical triplicate. \* $p < 0.05$  vs basal control, ^ $p < 0.05$  vs RVCM conditioned media alone by one-  
476 way ANOVA with post-hoc Tukey's correction. Each data point represents cells from one animal.  
477 Error bars represent means  $\pm$  SEM.

478

479

480

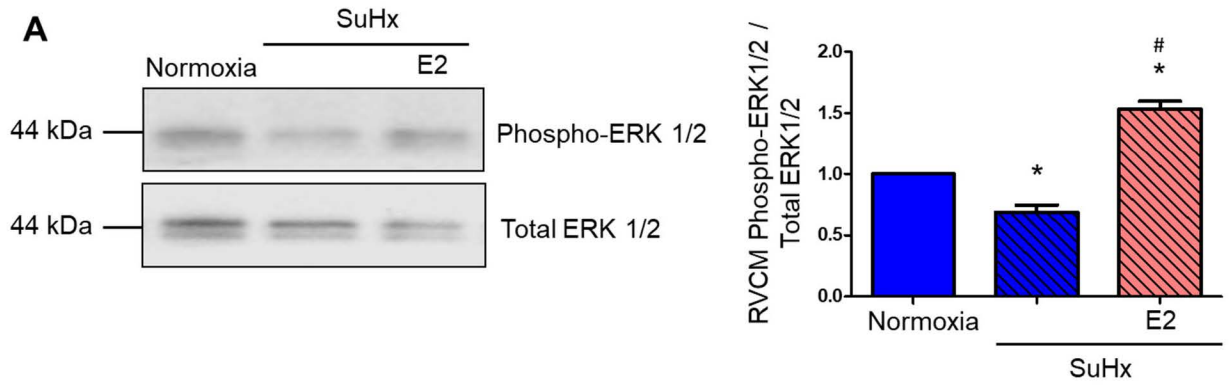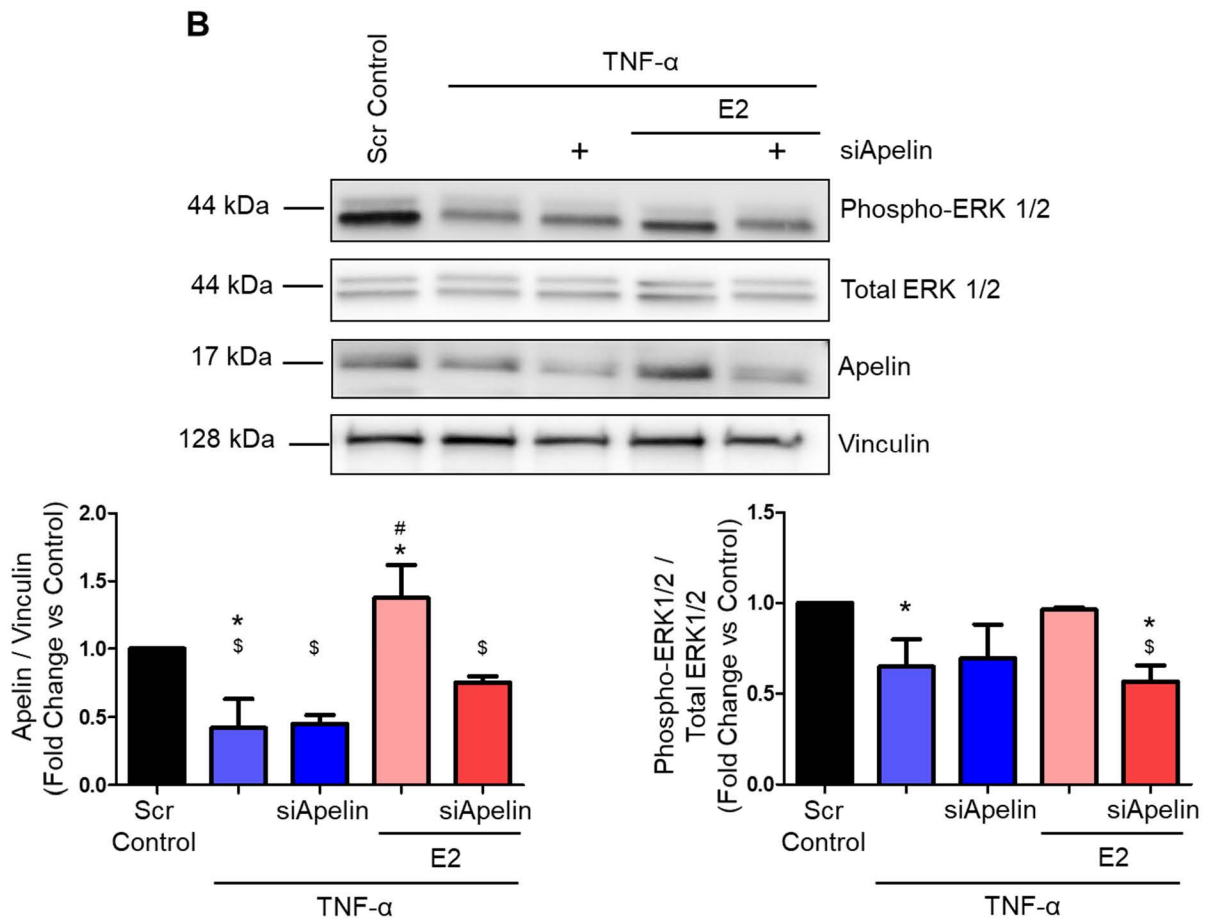

481

482

483

484

485 **Supplemental Figure 5: Apelin is necessary for E2-mediated stimulation of pro-survival**  
486 **effector ERK1/2. (A)** RV cardiomyocytes (RV CM) isolated from male SuHx-PH rats treated with  
487 E2 (75 µg/kg/day) exhibit increased phospho-ERK1/2 vs. RV cardiomyocytes from untreated  
488 SuHx-PH rats. N=4/group. **(B)** Effects of siRNA directed against apelin (5 nM) in H9c2  
489 cardiomyoblasts pre-treated with E2 (100 nM) for 24 hrs and then stressed with TNF-α (10 ng/ml;  
490 8 hrs). siRNA knockdown of apelin was performed 24 hrs prior to E2 treatment. N=3 independent  
491 experiments. All panels demonstrate representative Western blots with densitometric analyses  
492 for all animals or experiments. Scr = scramble siRNA control. \*p<0.05 vs. Normoxia control (A) or  
493 vs. Scr control (B), #p<0.05 vs. untreated SuHx-PH (A) and vs. TNF-treated (B), \$p<0.05 vs.  
494 TNF+E2 (B) by one-way ANOVA with post-hoc Tukey's correction. Values expressed as means  
495 ± SEM.

496

497

498

499

500

501

502

503

504

505

506

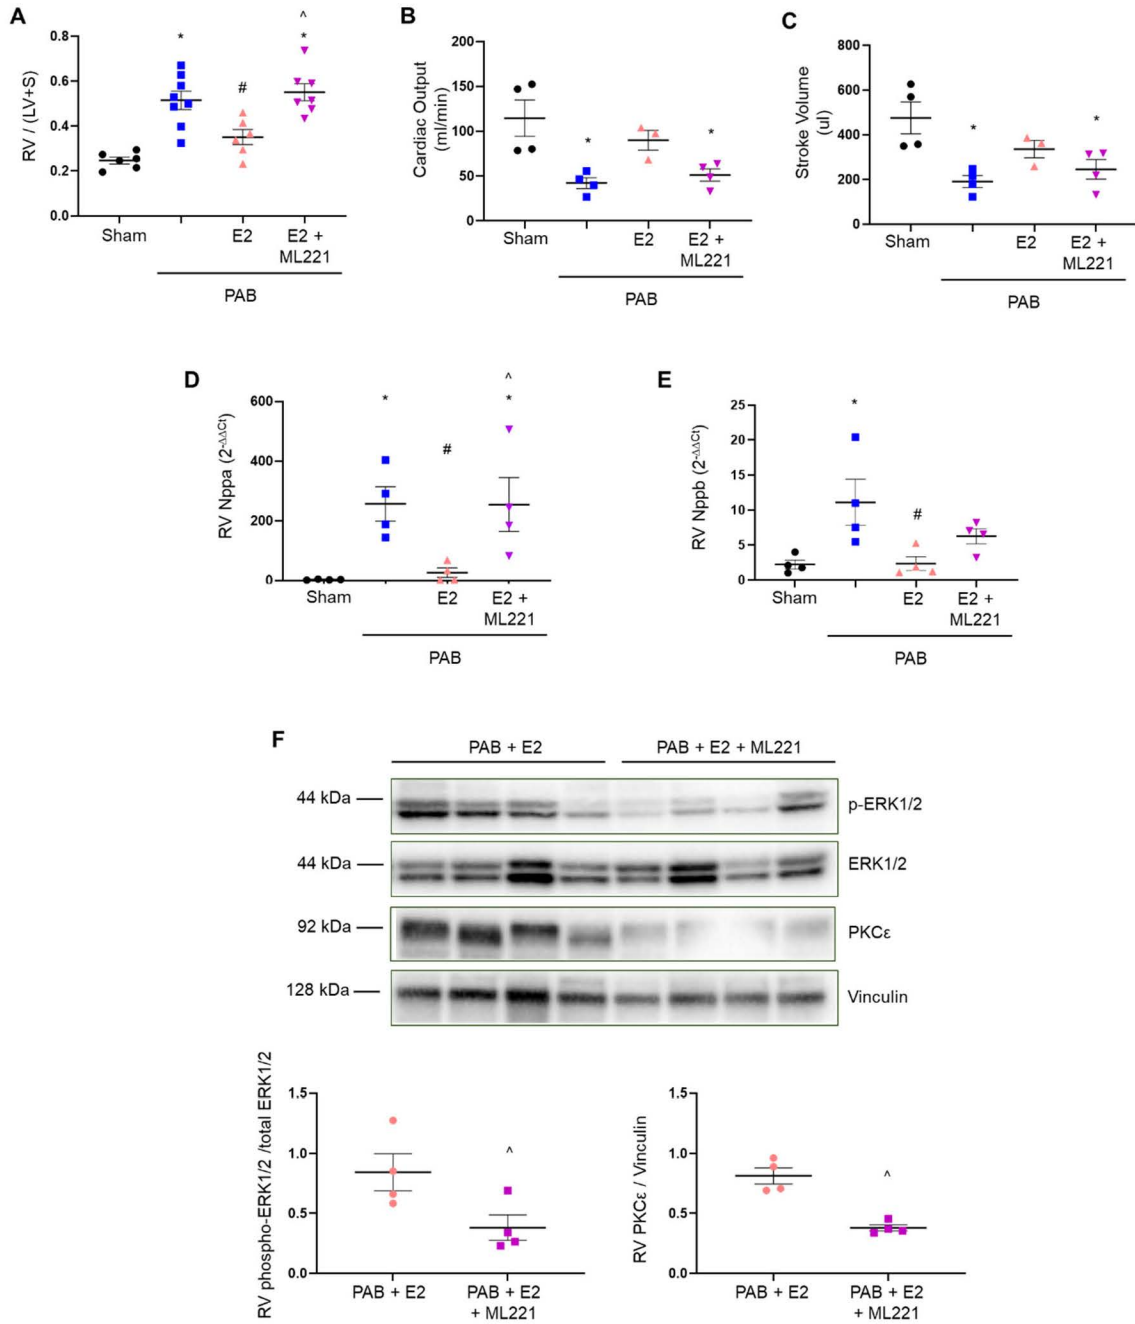

507

508

509

510

511

512 **Supplemental Figure 6: Apelin signaling is necessary for E2 to exert RV-protective effects**  
513 *in vivo*. Male Sprague-Dawley rats underwent pulmonary artery banding (PAB) or sham  
514 procedure. Subgroups of PAB animals received E2 (75 ug/kg/d via subcutaneous [sq] pellets) in  
515 absence or presence of APLNR antagonist ML221 (10 ug/kg/d via sq pellets) starting at the time  
516 of PAB. Animals were sacrificed after 13 weeks. E2 and ML221 were given throughout the entire  
517 duration of the experiment. (A-C) Effects of E2 ± ML221 treatment on RV hypertrophy (measured  
518 as weight of RV divided by weight of left ventricle plus septum; RV / [LV+S]), cardiac output, and  
519 stroke volume. Cardiac output and stroke volume were determined by pressure-volume loop  
520 assessment. (D-E) Assessment of RV neurohormonal activation by real-time RT-PCR. *Nppa* =  
521 atrial natriuretic peptide, *Nppb* = B-type natriuretic peptide. (F) Western blot analysis and  
522 densitometric quantification of apelin downstream inotropic and pro-survival mediators p-ERK and  
523 PKCε in RV homogenates of rats treated with E2 ± ML221. \*p<0.05 vs sham, #p<0.05  
524 vs. untreated PAB, ^p<0.05 vs PAB+E2 by one-way ANOVA with Tukey or Dunnett's post-hoc  
525 correction. Each data point represents one animal. Error bars represent means ± SEM.

526

527

528

529

530

531

532

533

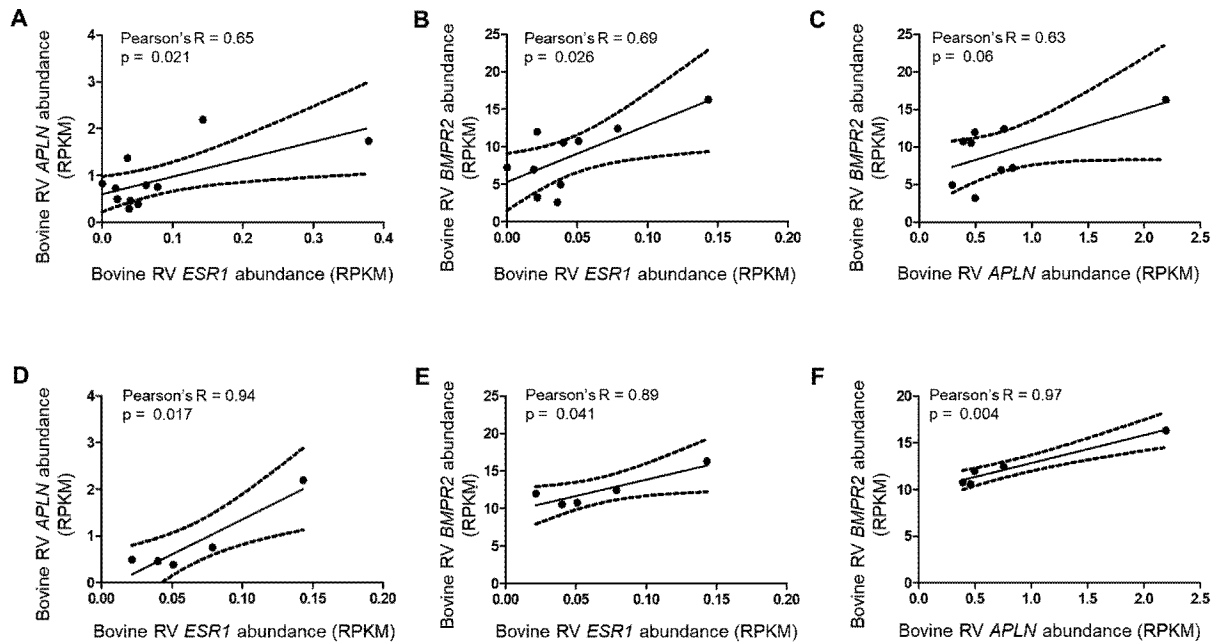

534

535 **Supplemental Figure 7: Correlations between ER $\alpha$ , apelin and BMPR2 expression (by RNA-**

536 **Seq) in RVs from yearling steers raised at high elevation. Studies were performed in the entire**

537 **group of animals (steers with and without PH) as well as in the subset of steers with PH and RV**

538 **failure. (A-C) Correlations between ESR1 (ER $\alpha$ ), APLN (Apelin) and BMPR2 mRNA in RVs from**

539 **steers with or without high-altitude induced PH. (D-E) Correlations between ESR1, APLN and**

540 **BMPR2 mRNA in RVs from steers with PH only. Note more robust correlations in the PH group.**

541 **RPKM = reads per kilobase per million mapped reads. Analyses were performed by determining**

542 **Pearson's correlation coefficient (R) and two-tailed p-value. Dashed lines represent 95%**

543 **confidence intervals.**

544

545

546

547

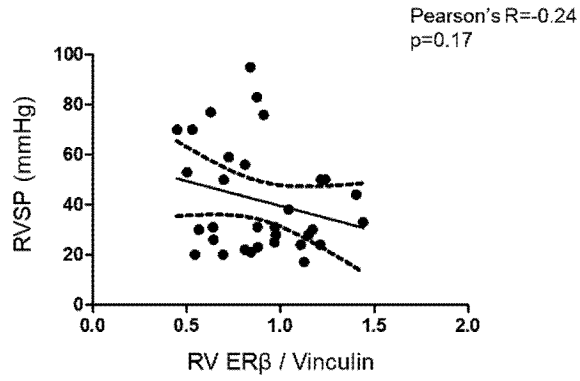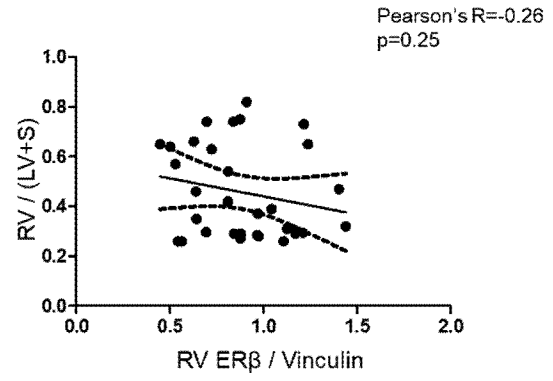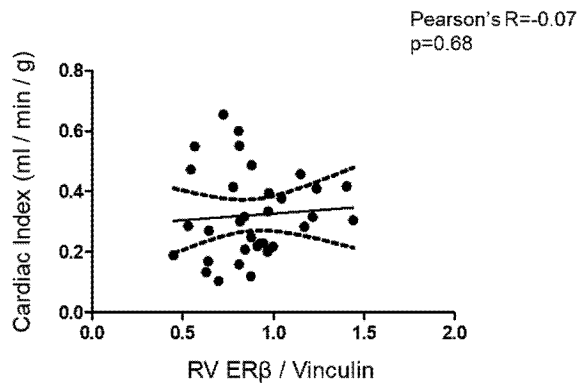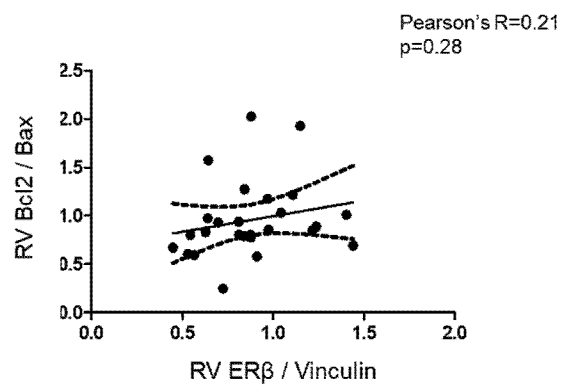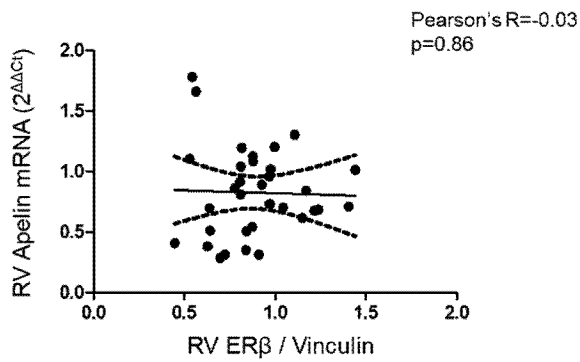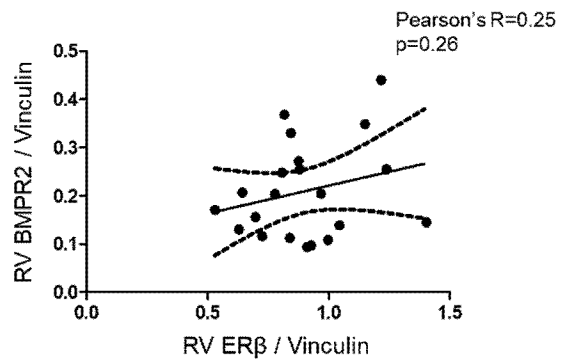

548

549

550

551

552

553 **Supplemental Figure 8. ER $\beta$  does not correlate with parameters of RV function.** RV ER $\beta$   
554 protein expression (determined by Western blot) in male and female normoxic control or SuHx-  
555 PH rats does not correlate with RV systolic pressure (RVSP), RV hypertrophy (Fulton index;  
556 RV/(LV + S)), cardiac index or pro-survival signaling (Bcl2/Bax ratio by Western blot), or with RV  
557 apelin or BMPR2 expression. SuHx-PH animals include intact male and female SuHx-PH rats,  
558 ovariectomized SuHx-PH females, and ovariectomized SuHx-PH females replete with E2 (75  
559  $\mu$ g/kg/day). Analyses were performed by determining Pearson's correlation coefficient (R) and  
560 two-tailed p-value. Dashed lines represent 95% confidence intervals.

561

562

563

564

565

566

567

568

569

570

571

572

573



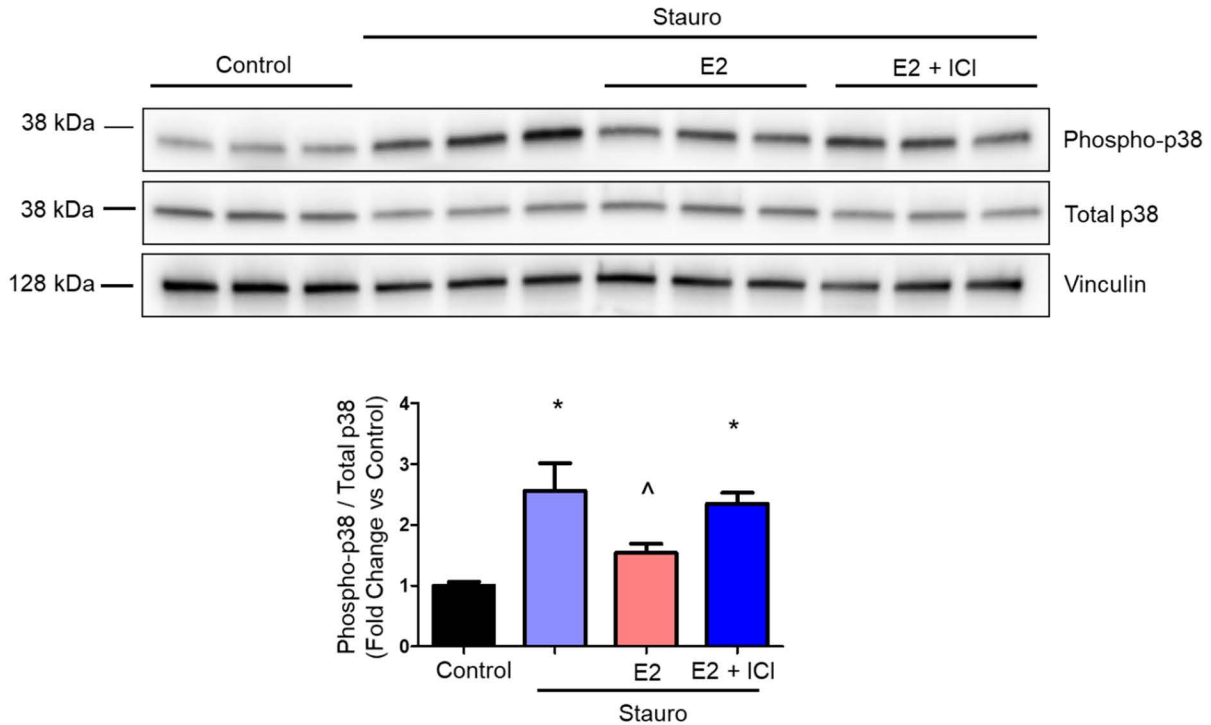

574

575 **Supplemental Figure 9: E2 attenuates staurosporine-induced stress signaling in H9c2 cells**

576 **in an ER-dependent manner.** Western blot analysis and densitometry of stress response

577 mediator phospho-p38MAPK in H9c2 cells treated with staurosporine, E2 or ER-antagonist

578 fulvestrant (ICI 182,780). Staurosporine (50 nM, 4 hrs) induces phospho-p38MAPK, whereas E2

579 pretreatment (100 nM, 24 hrs) reduces phospho-P38MAPK expression; these changes are

580 attenuated after ER antagonism with fulvestrant (labelled as “ICI”; 100 nM, 24 hrs.) \*p<0.05 vs.

581 control; ^p<0.05 vs. stauro and E2 + ICI (one-way ANOVA with post-hoc Dunnett’s correction).

582 N=3 independent experiments. Values expressed as means ± SEM.

583

584

585

586

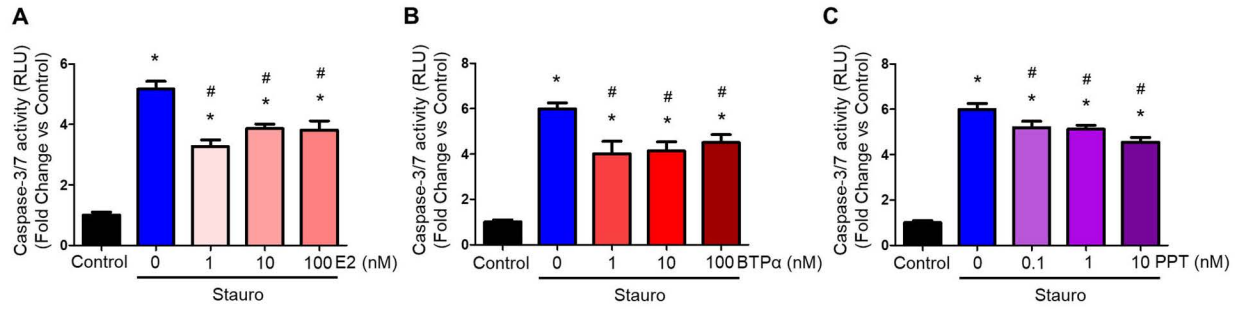

587

588 **Supplemental Figure 10: E2 or ER $\alpha$  agonists BTP $\alpha$  and PPT attenuate staurosporine-**  
 589 **induced pro-apoptotic signaling in H9c2 cells.** Cells were treated with (A) E2 (1-100 nM; 24  
 590 hrs), (B) BTP $\alpha$  (1-100 nM; 24 hrs) or (C) PPT (0.1-10 nM; 24 hrs) followed by staurosporine (50  
 591 nM, 24 hrs), and caspase-3/7 activity was measured (expressed in relative light units [RLU]).  
 592 EtOH (E2) or DMSO (BTP $\alpha$ , PPT) were used as vehicle controls (labelled as "0"). \*p<0.05 vs.  
 593 control (no staurosporine), #p<0.05 vs. vehicle-treated staurosporine group by one-way ANOVA  
 594 with post-hoc Dunnett's test. N=3 independent experiments. Values expressed as means  $\pm$  SEM.

595

596

597

598

599

600

601

602

603

604

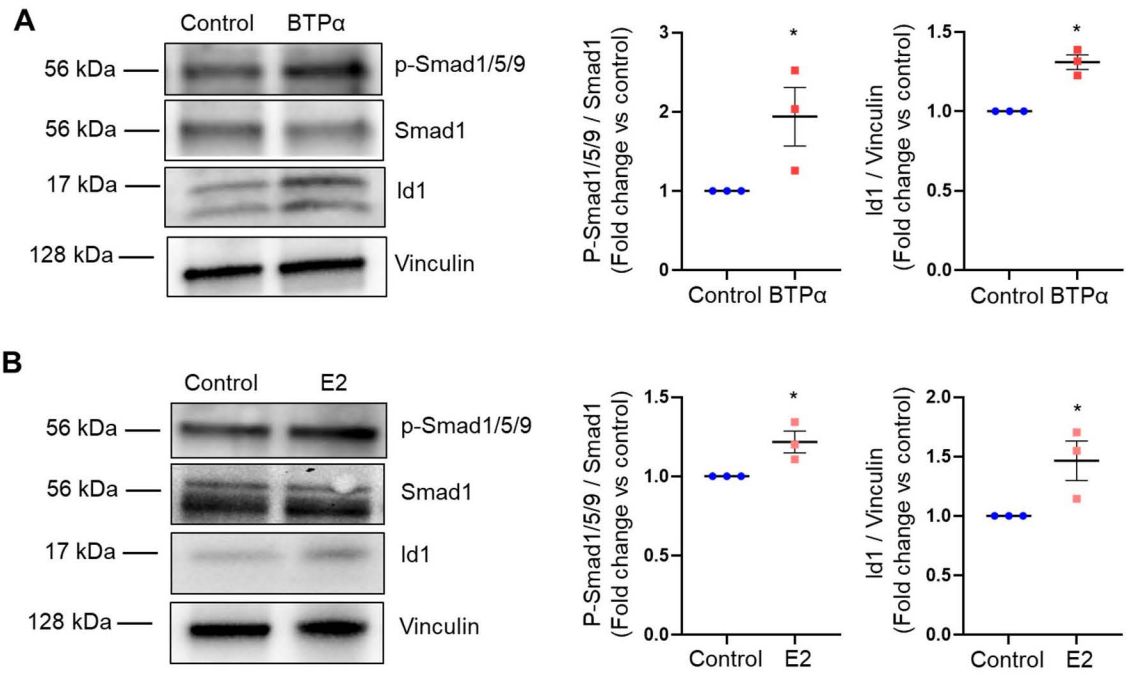

605

606

607

608

609

610

611

612

613

614

615

616

617

618

**Supplemental Figure 11: Treatment with E2 or ERα agonist upregulates BMPR2 downstream signaling in rat cardiomyoblasts.** (A) Effects of treatment with ERα agonist BTPα (100 nM, 24 hrs) on phospho-Smad1/5/9 and Id1 expression in H9c2 rat cardiomyoblasts analyzed by Western blot. (B) Phospho-Smad1/5/9 and Id1 protein expression in H9c2 cells treated with E2 (10 nM, 24 hrs) analyzed by Western blot. Figures depict representative Western blots with densitometric analyses for all experiments. \*p<0.05 vs. untreated control by Student's t-test. N = 3 independent experiments. Error bars represent means ± SEM.

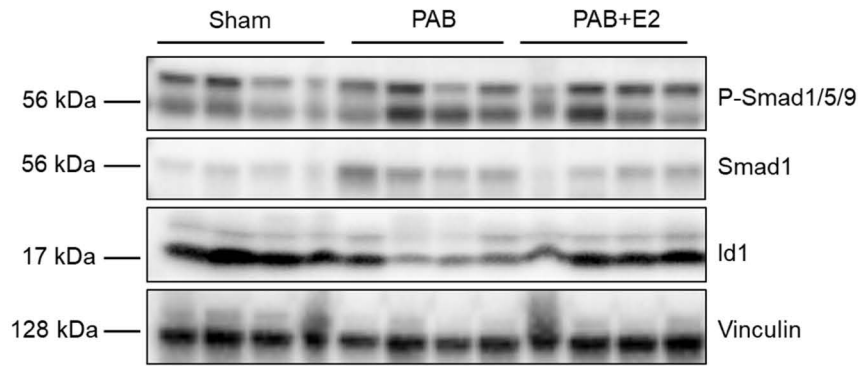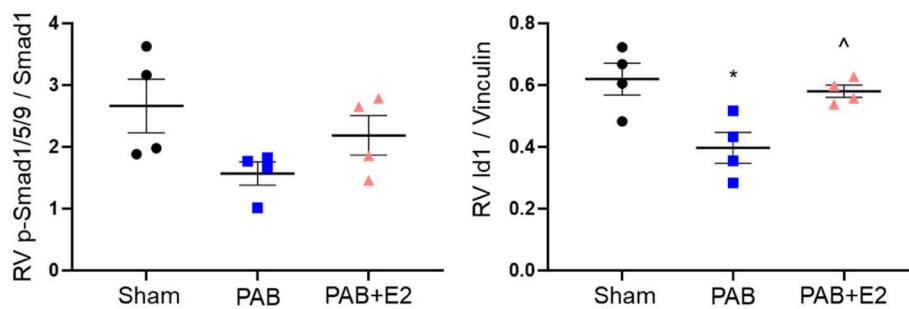

619

620

621 **Supplemental Figure 12: Treatment with E2 upregulates BMPR2 downstream signaling in**  
 622 **RVs from male or ovariectomized (OVX) female rats undergoing pulmonary artery banding**  
 623 **(PAB).** Animals were treated with E2 (75 µg/kg/day via subcutaneous pellets) starting at the time  
 624 of PAB. Treatment was continued for a total of 11 weeks. Note increased RV Id1 protein  
 625 expression and trend for increased Smad1/5/9 phosphorylation with E2 treatment. \*p<0.05 vs  
 626 sham, ^p<0.05 vs untreated PAB by ANOVA with post-hoc Tukey correction. Each data point  
 627 represents one animal. Error bars represent means ± SEM.

628

629

630

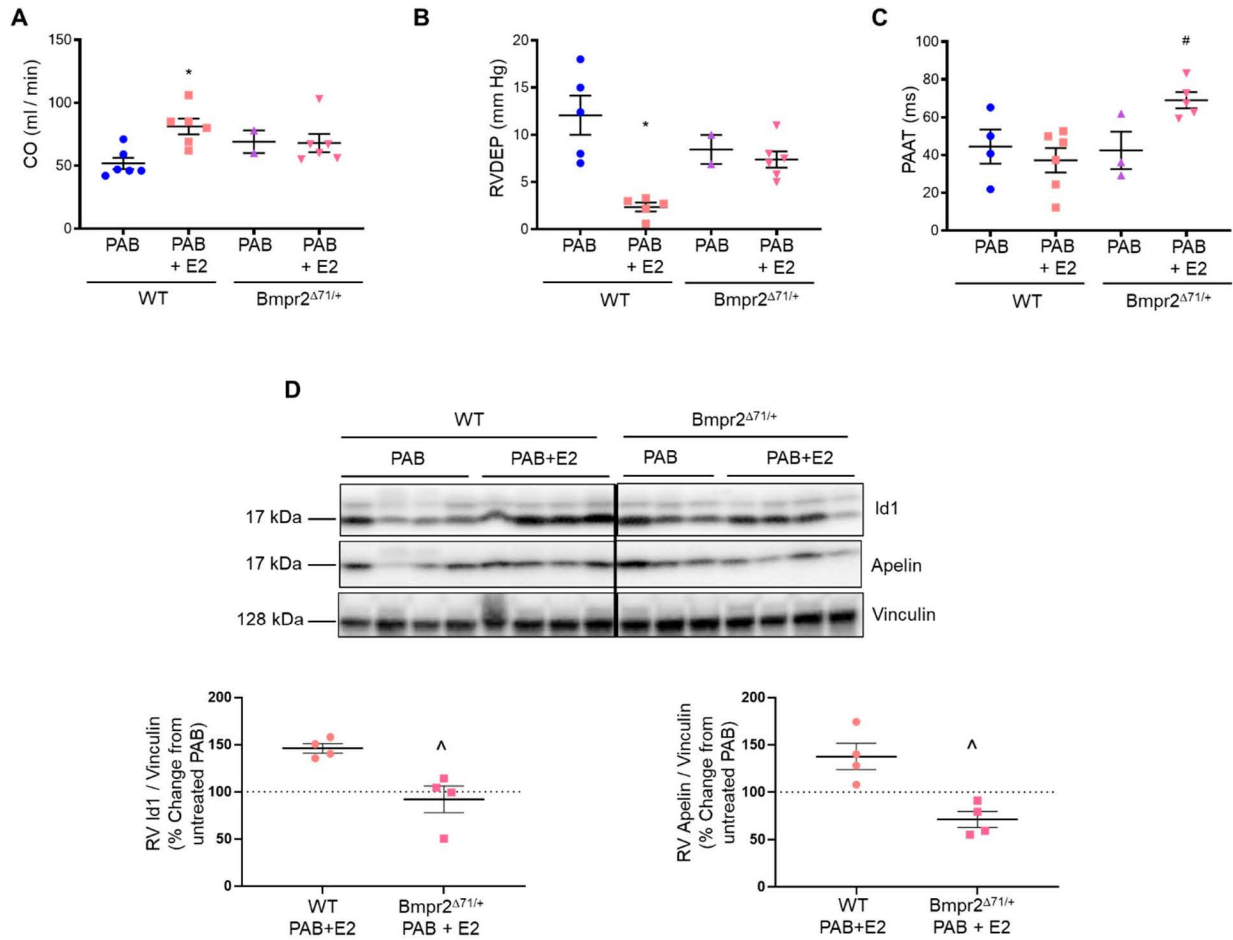

631

632

633

634 **Supplemental Figure 13: BMPR2 is necessary for E2-mediated protection against RV**

635 **failure induced by pulmonary artery banding (PAB).** Male or ovariectomized female wild-type

636 (WT) or Bmpr2<sup>Δ71/+</sup> mutant rats underwent PAB with or without E2 (75 ug/kg/day via

637 subcutaneous pellets for a total of 10 weeks). (A-C) Effects of Bmpr2<sup>Δ71/+</sup> mutation on E2-

638 mediated changes in RV cardiac output (CO; A), RV end-diastolic pressure (RVDEP; B) and

639 pulmonary artery acceleration time (PAAT; C). Note lack of E2-mediated increase in CO and lack

640 of E2-mediated decrease in RVDEP in Bmpr2<sup>Δ71/+</sup> mutant rats as well as E2-mediated increase

641 in PAAT in mutant rats. \*p<0.05 vs PAB WT, #p<0.05 vs WT PAB+E2 by one-way ANOVA with

642 Tukey post-hoc correction. Each data point represents one animal. (D) Western blot and

643 densitometric analysis demonstrate decreased ability of E2 to mediate increases in RV Id1 and  
644 apelin in *Bmpr2* $\Delta$ 71/+ mutant rats (data expressed as fold-change increase in RV Id1 or apelin  
645 with E2 vs untreated). Representative images were run on the same gel but were noncontiguous,  
646 indicated by the black line. <sup>^</sup>p<0.05 vs. WT by Student's t-test. Error bars represent  
647 means  $\pm$  SEM.

648

649

650

651

652

653

654

655

656

657

658

659

660

661

662

663

664

665

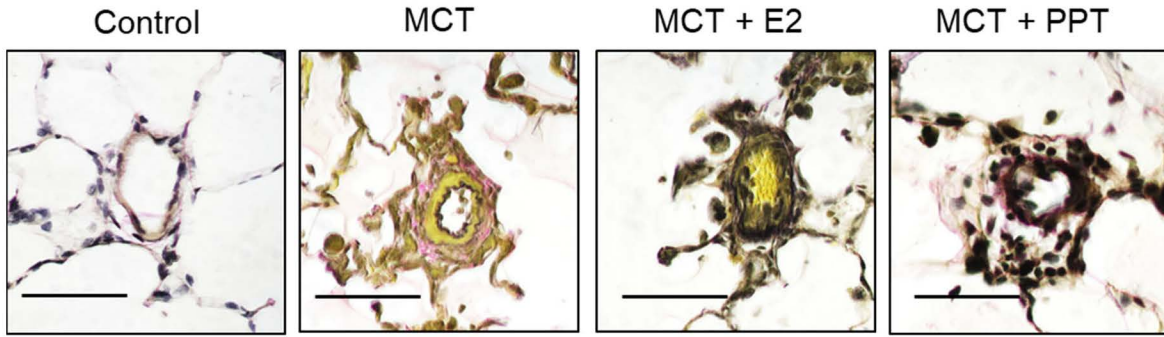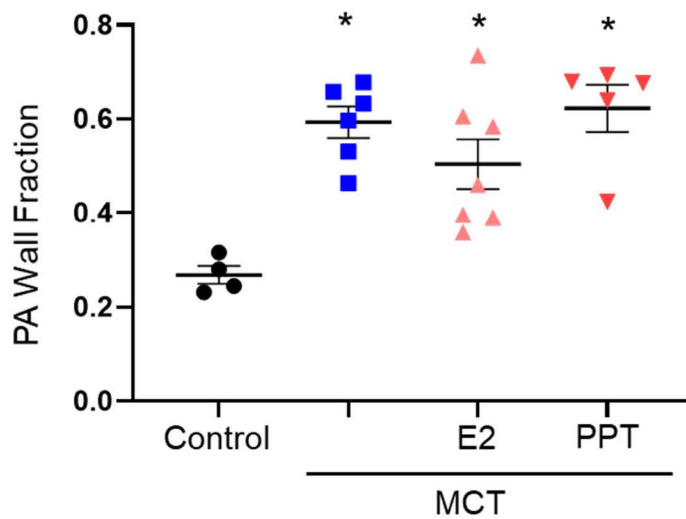

666

667

668 **Supplemental Figure 14: Rescue treatment with E2 or ER $\alpha$  agonist PPT in male MCT rats**

669 **does not affect pulmonary artery (PA) remodeling.** E2 or PPT were given for 2 weeks (starting

670 2 weeks after MCT administration) as outlined in Fig. 11. PA remodeling was assessed by

671 Verhoeff-Van Giesson staining and subsequent determination of PA wall fraction ([vessel

672 diameter – lumen diameter] / vessel diameter). 20 vessels <200  $\mu$ m per animal were analyzed.

673 Representative images for each group are shown in upper panel. Size bars = 50  $\mu$ m.

674 Quantification is shown in lower panel. \* $p$ <0.05 vs control by one-way ANOVA with Tukey post-

675 hoc correction. Each data point represents one animal. Error bars represent means  $\pm$  SEM.

676

677

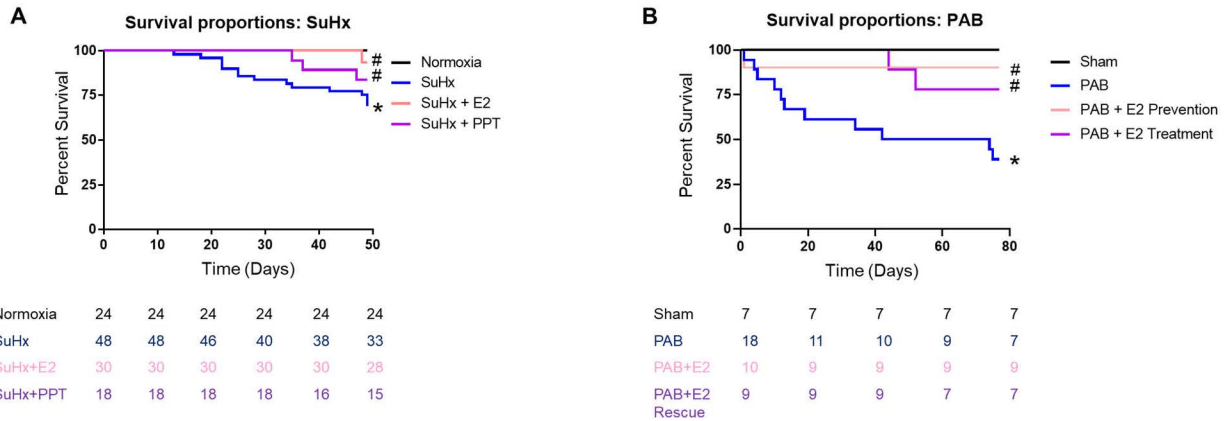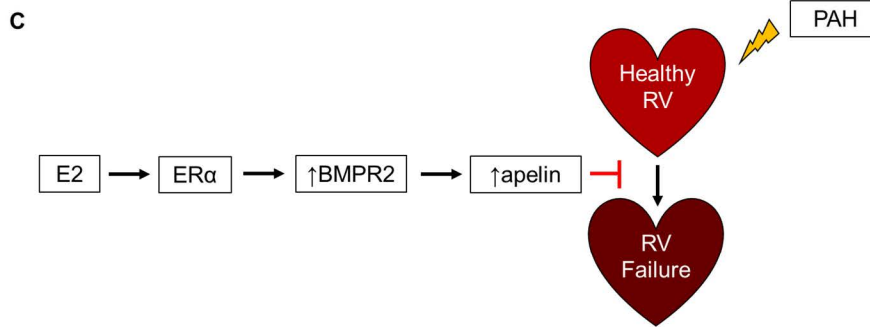

678

679 **Supplemental Figure 15: Effects of E2 or PPT treatment on survival in SuHx-PH or**

680 **pulmonary artery banding (PAB).** (A) Male Sprague-Dawley rats were treated with E2 (75

681  $\mu\text{g}/\text{kg}/\text{day}$  via subcutaneous pellets) or PPT (850  $\mu\text{g}/\text{kg}/\text{day}$  via subcutaneous pellets) starting

682 one week prior to SuHx induction. Premature mortality at seven weeks after SuHx initiation was

683 15/48 (31.2%) in the untreated SuHx-PH group, 2/30 (6.6%) in the SuHx+E2 group, and 3/18

684 (14.3%) in the SuHx+PPT group ( $p < 0.05$  by Log-rank [Mantel-Cox] test). (B) Male Sprague-

685 Dawley rats were treated with E2 (75  $\mu\text{g}/\text{kg}/\text{day}$  via subcutaneous pellets) starting at the time of

686 PAB. Premature mortality at eleven weeks after PAB initiation was 11/18 (61.1%) in the untreated

687 PAB group, 1/10 (10%) in the PAB+E2 prevention group, and 2/9 (22.2%) in the PAB+E2 rescue

688 group. Numbers below graphs indicate animals at risk for corresponding time point.  $*p < 0.05$

689 vs normoxia control or sham,  $\#p < 0.05$  vs. untreated SuHx or PAB by Log-rank [Mantel-Cox] test.

690 (C) depicts summary of experimental findings described in this manuscript.



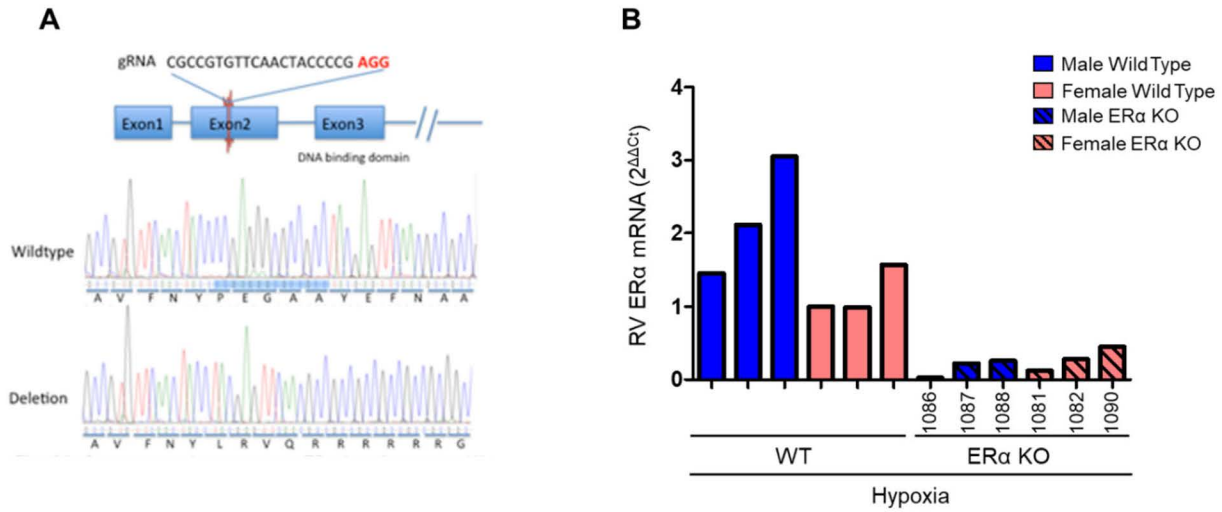

691

692

693

694 **Supplemental Figure 16: ERα mRNA expression is decreased in ERα (*Esr1*) mutated**

695 **Sprague-Dawley rats.** ERα mRNA expression by quantitative RT-PCR in ERα (*Esr1*) mutated

696 rat RVs. Animal numbers correspond with animal numbers in Supplemental Table 1. Relatively

697 higher apelin expression was noted in rats with mutations predicted to be heterozygous or

698 hypomorph, suggesting partial expression or function of ERα may be sufficient to increase apelin.

699

700

701

702

703

704

705

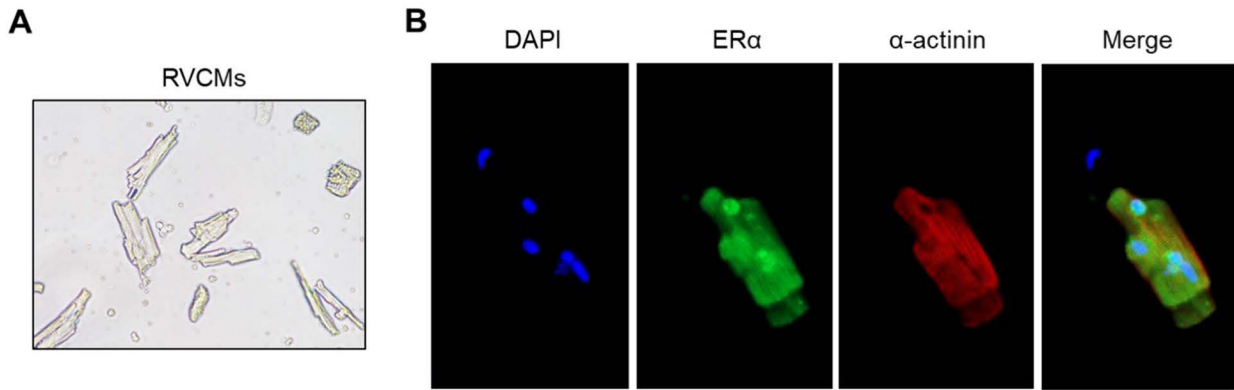

706

707

708 **Supplemental Figure 17: Rat RV cardiomyocyte (RVCMS) isolation.** A viable cardiomyocyte  
709 phenotype was confirmed by striated pattern, rectangular shape and  $\alpha$ -actinin expression. (A)  
710 Brightfield image of isolated RVCMSs. Note striated pattern and rectangular shape of  
711 cardiomyocytes. (B) ER $\alpha$  is expressed in rat RVCMSs. Immunofluorescence staining for ER $\alpha$   
712 expression (green),  $\alpha$ -actinin (red), and DAPI (nuclei; blue). Images taken at 40x.

713

714

715

716

717

718

719

720

721
